# Supplementary material for: Progression and Regression of Chronic Kidney Disease by Age Among Adults in a Population-Based Cohort in Alberta, Canada
Source: PubMed Central journal article supplement (PMC8188272; doi:10.1001/jamanetworkopen.2021.12828), 2021-06-08
Supplement: jamanetwopen-e2112828-s001.pdf [file jamanetwopen-e2112828-s001.pdf]

## Supplementary Online Content

Liu P, Quinn RR, Lam NN, et al. Progression and regression of chronic kidney disease by age among adults in a population-based cohort in Alberta, Canada. *JAMA Netw Open*. 2021;4(6):e2112828. doi:10.1001/jamanetworkopen.2021.12828

**eMethods.** CKD Cohorts, Mean eGFR Method, and Covariates

**eTable 1.** Methods for Cohort Formation and Outcome Definition

**eTable 2.** Codes for Identifying Dialysis or Kidney Transplantation Using Administrative Data

**eTable 3.** Codes for Identifying Angiogram and Cardiac Catheterization Using Administrative Data

**eTable 4.** Cohort Formation, Applying the >90 Days Chronicity Criterion

**eTable 5.** Summary of Follow-up Times and Outcomes

**eTable 6.** Incidence Rate Ratios (95% CIs) of Outpatient eGFR Measurements During Follow-up by Age

**eTable 7.** Proportions and Outcomes of Cohort Members With a Single Outpatient eGFR Measurement During Follow-up

**eTable 8.** Baseline Characteristics, by CKD Stage (Moving Average eGFR Method)

**eFigure 1.** Study Design

**eFigure 2.** Values, Counts, and Rates of eGFR Measurements During the Qualifying Period, by Age Categories

**eFigure 3.** Number of Individuals, by Levels of Albuminuria and Age Categories

**eFigure 4.** Cumulative Incidence Functions Over Time From Initial CKD Stage

**eFigure 5.** Probabilities of Outcomes at 5 Years From Initial CKD Stage, by Levels of Albuminuria and Age Categories at Baseline

**eFigure 6.** Probabilities of Outcomes at 5 Years From Initial CKD Stage, by Age Categories, in Those Without Inpatient or Emergency Department Serum Creatinine Measurements Within 3 Years Before Cohort Entry

**eFigure 7.** Probabilities of Outcomes at 5 Years From Initial CKD Stage, by Age Categories, in Those Without Hospitalizations Within 3 Months Before Cohort Entry

**eFigure 8.** Probabilities of Outcomes at 5 Years From Initial CKD Stage, by Age Categories, in Those Without Emergency Department Visits Within 3 Months Before Cohort Entry

**eFigure 9.** Probabilities of Outcomes at 5 Years From Initial CKD Stage, by Age Categories, in Those Without Receiving Angiogram or Cardiac Catheterization Within 3 Months Before Cohort Entry

**eFigure 10.** Probabilities of Outcomes at 5 Years From Initial CKD Stage, by Age Categories, in Those With No Events Within 1 Year or 2 Years

**eFigure 11.** Probabilities of Outcomes at 5 Years From Initial CKD Stage, by Dispensation of ACEI/ARBs and Age Categories at Baseline

**eFigure 12.** Probabilities of Outcomes at 5 Years From Initial CKD Stage, by Diabetes, Cardiovascular Disease, and Age Categories at Baseline

**eFigure 13.** Cumulative Incidence Functions Over Time Following Regression

**eFigure 14.** Probabilities of Outcomes at 5 Years Following Regression

**eFigure 15.** Probabilities of Outcomes at 5 Years Following Regression, by Age Categories

**eFigure 16.** Incidence of CKD, by CKD Stage and Age Categories (Moving Average eGFR Method)

**eFigure 17.** Probabilities of Outcomes at 5 Years From Initial CKD Stage (Moving Average eGFR Method)

**eFigure 18.** Probabilities of Outcomes at 5 Years From Initial CKD Stage, by Age Categories (Moving Average eGFR Method)

**eFigure 19.** Probabilities of Outcomes at 5 Years From Initial CKD Stage (91-455 Days Chronicity Criterion)

**eFigure 20.** Probabilities of Outcomes at 5 Years From Initial CKD Stage, by Age Categories (91-455 Days Chronicity Criterion)

**eReferences**

This supplementary material has been provided by the authors to give readers additional information about their work.

## eMethods. CKD Cohorts, Mean eGFR Method, and Covariates

### CKD cohorts

For each CKD cohort, we made efforts to minimize the inclusion of prevalent patients. First, individuals who were included in the mild CKD cohort were eligible to enter more severe CKD cohorts later during the study period. Individuals who were initially included in moderate CKD cohort could not enter the mild CKD cohort and those initially included in the severe CKD cohort were no longer eligible for inclusion in the mild-moderate CKD cohorts. Second, we used previous eGFR data (available from May 1, 2002) and kidney replacement data as look-back window and excluded: (1) those who had received dialysis or kidney transplantation on or prior to the index date; (2) those who had one or more outpatient eGFR  $<15 \text{ mL/min/1.73 m}^2$  prior to the qualifying period for each stage. Finally, since the index date had to fall between April 1, 2009 and March 31, 2015, we excluded those whose qualifying period for a CKD stage occurred before April 1, 2009 and qualified again on or after April 1, 2009 for the same or a less severe CKD stage. People who qualified to enter a stage prior to April 1, 2009 were eligible to enter the study on or after April 1, 2009 only if they qualified for a less severe CKD stage before April 1, 2009.

Identification of acute or chronic kidney replacement therapies: We used the provincial registration data (available from January 1, 2001) to identify chronic dialysis and kidney transplantation. Acute dialysis and early kidney transplantation that were not captured in the registration were identified from administrative data (available from April 1, 1994; related codes are shown in Appendix Table 2).

### Moving average eGFR method

In the absence of a guideline on how to use routinely collected data to define a CKD stage and kidney outcomes,<sup>1</sup> in addition to the *sustained eGFR method* (main analyses), we implemented the *moving average eGFR method* (sensitivity analyses; Appendix Table 1). To select the earliest series (qualifying period) for cohort entry, the eGFR value defining the CKD stage was the mean (index eGFR) of all measurements in a qualifying period, and all eGFR values in that series of measurements were  $<60 \text{ mL/min/1.73 m}^2$ . The date of the last eGFR in a qualifying period defined the index date (cohort entry). We also used the moving average eGFR method to ascertain kidney outcomes.

### Covariates

We considered the following characteristics to describe the cohorts at baseline: age, sex, index eGFR, duration of the qualifying period, number of eGFR measurements during the qualifying period, prior outpatient eGFR (defined as the outpatient eGFR just prior to the qualifying period), albuminuria, comorbidities, acute conditions or receipt of potentially nephrotoxic procedures within 3 months prior to cohort entry (hospitalizations, emergency department visits, or receipt of angiogram or cardiac catheterization), and drugs dispensed within the year prior to cohort entry (Supplemental methods; eTable 3). We used the most recent outpatient albuminuria values before study entry and categorized as normal/mild, moderate, severe, or unmeasured, with the following types of measurement in descending order of preference: albumin-to-creatinine ratio ( $<30$ , 30 to 300, or  $>300 \text{ mg/g}$ ), protein-to-creatinine ratio ( $<150$ , 150 to 500, or  $>500 \text{ mg/g}$ ), and urine dipstick protein (negative or trace, 1+, or  $\geq 2+$ ).<sup>1</sup> If there were  $\geq 2$  same type measurements on the same day, we used the median value of ACR or PCR measurements; for urine dipstick measurements we applied floor function of median category that returns the largest integer less than or equal to a given value. We used validated algorithms<sup>2</sup> to identify important comorbidities, including diabetes, hypertension, cardiovascular disease (presence of congestive heart failure, myocardial infarction, peripheral vascular disease, or stroke), cancer (presence of metastatic cancer, non-metastatic cancer, or lymphoma), and dementia. We identified cohort members who had any hospitalizations, emergency department visits, or underwent angiogram or cardiac catheterization (code listed in eTable 3) within 3 months prior to cohort entry. We identified exposure to drugs including angiotensin-converting enzyme inhibitors or angiotensin receptor blockers (ACEI/ARBs), statins, and nonsteroidal anti-inflammatory drugs. This was defined as at least one dispensation for these drugs within the year before study entry, using provincial pharmaceutical databases.

**eTable 1. Methods for Cohort Formation and Outcome Definition**

1) Initial cohorts

| Initial cohorts                   | Qualifying period for entry |         |                                        |                        | Outcomes                       | Qualifying period for outcomes |         |                                          |                        |
|-----------------------------------|-----------------------------|---------|----------------------------------------|------------------------|--------------------------------|--------------------------------|---------|------------------------------------------|------------------------|
|                                   | First eGFR                  | Between | Last eGFR <sup>a</sup><br>(Index date) | Mean eGFR <sup>b</sup> |                                | First eGFR                     | Between | Last eGFR <sup>a</sup><br>(outcome date) | Mean eGFR <sup>b</sup> |
| <i>Sustained eGFR method</i>      |                             |         |                                        |                        |                                |                                |         |                                          |                        |
| Mild CKD                          | <60                         | <60     | ≥45 to <60                             | –                      | Regression                     | ≥60                            | ≥60     | ≥60                                      | –                      |
|                                   |                             |         |                                        |                        | Progression                    | <45                            | <45     | <45                                      | –                      |
|                                   |                             |         |                                        |                        | Kidney failure <sub>eGFR</sub> | <15                            | <15     | <15                                      | –                      |
| Moderate CKD                      | <45                         | <45     | ≥30 to <45                             | –                      | Regression                     | ≥45                            | ≥45     | ≥45                                      | –                      |
|                                   |                             |         |                                        |                        | Progression                    | <30                            | <30     | <30                                      | –                      |
|                                   |                             |         |                                        |                        | Kidney failure <sub>eGFR</sub> | <15                            | <15     | <15                                      | –                      |
| Severe CKD                        | <30                         | <30     | ≥15 to <30                             | –                      | Regression                     | ≥30                            | ≥30     | ≥30                                      | –                      |
|                                   |                             |         |                                        |                        | Kidney failure <sub>eGFR</sub> | <15                            | <15     | <15                                      | –                      |
| <i>Moving average eGFR method</i> |                             |         |                                        |                        |                                |                                |         |                                          |                        |
| Mild CKD                          | <60                         | <60     | <60                                    | ≥45 to <60             | Regression                     | Any                            | Any     | Any                                      | ≥60                    |
|                                   |                             |         |                                        |                        | Progression                    | <60                            | <60     | <60                                      | <45                    |
|                                   |                             |         |                                        |                        | Kidney failure <sub>eGFR</sub> | <60                            | <60     | <60                                      | <15                    |
| Moderate CKD                      | <60                         | <60     | <60                                    | ≥30 to <45             | Regression                     | Any                            | Any     | Any                                      | ≥45                    |
|                                   |                             |         |                                        |                        | Progression                    | <60                            | <60     | <60                                      | <30                    |
|                                   |                             |         |                                        |                        | Kidney failure <sub>eGFR</sub> | <60                            | <60     | <60                                      | <15                    |
| Severe CKD                        | <60                         | <60     | <60                                    | ≥15 to <30             | Regression                     | Any                            | Any     | Any                                      | ≥30                    |
|                                   |                             |         |                                        |                        | Kidney failure <sub>eGFR</sub> | <60                            | <60     | <60                                      | <15                    |

2) Sub-cohorts following regression

| Initial cohorts                   | Sub-cohort regressed to | Outcomes                       | Qualifying period for stage change |         |                                          |                        |
|-----------------------------------|-------------------------|--------------------------------|------------------------------------|---------|------------------------------------------|------------------------|
|                                   |                         |                                | First eGFR                         | Between | Last eGFR <sup>c</sup><br>(outcome date) | Mean eGFR <sup>d</sup> |
| <i>Sustained eGFR method</i>      |                         |                                |                                    |         |                                          |                        |
| Mild CKD                          | G1-2                    | Progression                    | <60                                | <60     | <60                                      | -                      |
|                                   |                         | Kidney failure <sub>eGFR</sub> | <15                                | <15     | <15                                      | -                      |
| Moderate CKD                      | G1-3a                   | Further regression             | ≥60                                | ≥60     | ≥60                                      | -                      |
|                                   |                         | Progression                    | <45                                | <45     | <45                                      | -                      |
|                                   |                         | Kidney failure <sub>eGFR</sub> | <15                                | <15     | <15                                      | -                      |
| Severe CKD                        | G1-3b                   | Further regression             | ≥45                                | ≥45     | ≥45                                      | -                      |
|                                   |                         | Progression                    | <30                                | <30     | <30                                      | -                      |
|                                   |                         | Kidney failure <sub>eGFR</sub> | <15                                | <15     | <15                                      | -                      |
| <i>Moving average eGFR method</i> |                         |                                |                                    |         |                                          |                        |
| Mild CKD                          | G1-2                    | Progression                    | <60                                | <60     | <60                                      | <60                    |
|                                   |                         | Kidney failure <sub>eGFR</sub> | <60                                | <60     | <60                                      | <15                    |
| Moderate CKD                      | G1-3a                   | Further regression             | Any                                | Any     | Any                                      | ≥60                    |
|                                   |                         | Progression                    | <60                                | <60     | <60                                      | <45                    |
|                                   |                         | Kidney failure <sub>eGFR</sub> | <60                                | <60     | <60                                      | <15                    |
| Severe CKD                        | G1-3b                   | Further regression             | Any                                | Any     | Any                                      | ≥45                    |
|                                   |                         | Progression                    | <60                                | <60     | <60                                      | <30                    |
|                                   |                         | Kidney failure <sub>eGFR</sub> | <60                                | <60     | <60                                      | <15                    |

Note: eGFR, estimated glomerular filtration rate (mL/min/1.73 m<sup>2</sup>).

<sup>a</sup> For the initial cohort using the sustained method, the last eGFR during the qualifying period for cohort entry was the baseline eGFR. Outcome of regression was defined as a sustained improvement to a better eGFR category for >3 months, accompanied by a 25% or greater increase in the last eGFR from baseline; Outcome of progression is defined as a sustained drop in eGFR category for >3 months, accompanied by a 25% or greater drop in the last eGFR from baseline.

<sup>b</sup> For the initial cohort using the moving average method, the mean eGFR during the qualifying period for cohort entry was the baseline eGFR. Outcome of regression was defined as an improvement to a better eGFR category accompanied by a 25% or greater increase in the mean eGFR from baseline; Outcome of progression is defined as a drop in eGFR category accompanied by a 25% or greater drop in the mean eGFR from baseline.

<sup>c</sup> For the sub-cohort following regression using the sustained method, the new baseline eGFR (the last eGFR) was updated at the time of regression. Outcome of further regression was defined as a sustained improvement to a better eGFR category for >3 months, accompanied by a 25% or greater increase in the last eGFR from the new baseline; Outcome of progression is defined as a sustained drop in eGFR category for >3 months, accompanied by a 25% or greater drop in the last eGFR from the new baseline.

<sup>d</sup> For the sub-cohort following regression using the moving average method, the new baseline eGFR (the mean eGFR) was updated at the time of regression. Outcome of regression was defined as an improvement to a better eGFR category accompanied by a 25% or greater increase in the mean eGFR from the new baseline; Outcome of progression is defined as a drop in eGFR category accompanied by a 25% or greater drop in the mean eGFR from the new baseline.

## eTable 2. Codes for Identifying Dialysis or Kidney Transplantation Using Administrative Data

### 1) Physician claims: Canadian Classification of Diagnostic, Therapeutic, and Surgical Procedures codes

| Codes               | Code description                                                                                                 |
|---------------------|------------------------------------------------------------------------------------------------------------------|
| For dialysis        |                                                                                                                  |
| 13.99A              | Hemodialysis treatment, unstable patient                                                                         |
| 13.99B              | Hemodialysis treatment, stable patient                                                                           |
| 13.99C              | Assessment and management of an unstable patient with acute/chronic renal failure treated by peritoneal dialysis |
| 13.99D              | Assessment and management of a stable patient with chronic renal failure treated by peritoneal dialysis          |
| 13.99O              | Management of dialysis patients on home dialysis or receiving treatment in a remote hemodialysis unit (per week) |
| 13.99OA             | Management of patient on hemodialysis or peritoneal dialysis (per week)                                          |
| 13.99AB             | Dialysis therapy, any modality, in the intensive care unit                                                       |
| For transplantation |                                                                                                                  |
| 67.5                | Transplant of kidney                                                                                             |
| 67.59               | Other kidney transplantation                                                                                     |
| 67.59A              | Renal transplantation (homo, hetero, auto)                                                                       |

### 2) Hospitalizations

| Codes                                                                     | Code description                                                                                                                                |
|---------------------------------------------------------------------------|-------------------------------------------------------------------------------------------------------------------------------------------------|
| For transplantation: Canadian Classification of Health Intervention codes |                                                                                                                                                 |
| 1.PC.85.^                                                                 | Transplant, kidney                                                                                                                              |
| 1.PC.85.LA-XX-J                                                           | Using living donor (allogenic or syngeneic) kidney                                                                                              |
| 1.PC.85.LA-XX-K                                                           | Using deceased donor kidney                                                                                                                     |
| 1.OK.85.XU-XX-K                                                           | Transplant, pancreas with duodenum and kidney with exocrine drainage via bladder [e.g. donor duodenum is grafted to bladder: duodenocystostomy] |
| 1.OK.85.XV-XX-K                                                           | Transplant, pancreas with duodenum and kidney with exocrine drainage via intestine with homograft [e.g. donor duodenum is grafted to bowel]     |
| For transplantation: ICD-9-CM procedure codes                             |                                                                                                                                                 |
| 55.69                                                                     | Other kidney transplantation                                                                                                                    |

**eTable 3. Codes for Identifying Angiogram and Cardiac Catheterization Using Administrative Data**

| <b>Codes</b>                                                                                                                 | <b>Code description</b>                                                                                                                                                                                                                                                                                 |
|------------------------------------------------------------------------------------------------------------------------------|---------------------------------------------------------------------------------------------------------------------------------------------------------------------------------------------------------------------------------------------------------------------------------------------------------|
| Hospitalizations or Ambulatory Care Classification System (ACCS): Canadian Classification of Health Intervention (CCI) codes |                                                                                                                                                                                                                                                                                                         |
| 3.IP.10.^                                                                                                                    | <b>Xray, heart with coronary arteries</b><br><b>Includes:</b> Angiocardiology involving heart and coronary arteries<br>Angiography, coronary<br>Cardiac catheterization for coronary angiography<br>Coronary arteriography<br>Ventriculography with coronary angiograms<br>Xray with fluoroscopy, heart |
| 3.ID.10.^                                                                                                                    | <b>Xray, aorta</b> not elsewhere classified<br><b>Includes:</b> Angiography, aorta [ascending, thoracic, abdominal, arch]<br>Angiography, combined abdominal with thoracic aorta<br>Aortic root angiogram<br>Aortography, NEC<br>xray with fluoroscopy, aorta not elsewhere classified                  |
| 3.IS.10.VC                                                                                                                   | <b>Xray, vena cava</b> (superior and/or inferior) following intravenous injection of contrast (with or without fluoroscopy)<br><b>Includes:</b> Phlebography, vena cava<br>Venacavogram<br>Venography, vena cava<br>Xray with fluoroscopy, vena cava                                                    |
| Physician claims: Canadian Classification of Diagnostic, Therapeutic, and Surgical Procedures (CCPx) Codes                   |                                                                                                                                                                                                                                                                                                         |
| 47.72C                                                                                                                       | Percutaneous closure, atrial septal defect                                                                                                                                                                                                                                                              |
| 48.92A                                                                                                                       | Selective angiocardiology                                                                                                                                                                                                                                                                               |
| 48.93                                                                                                                        | Angiocardiology of right heart structures                                                                                                                                                                                                                                                               |
| 48.94                                                                                                                        | Angiocardiology of left heart structures                                                                                                                                                                                                                                                                |
| 48.95                                                                                                                        | Combined right and left heart angiocardiology                                                                                                                                                                                                                                                           |
| 48.96                                                                                                                        | Coronary arteriography using a single catheter                                                                                                                                                                                                                                                          |
| 48.97                                                                                                                        | Coronary arteriography using two catheters                                                                                                                                                                                                                                                              |
| 48.98                                                                                                                        | Other coronary arteriography                                                                                                                                                                                                                                                                            |
| 49.95                                                                                                                        | Right cardiac catheterization                                                                                                                                                                                                                                                                           |
| 49.96                                                                                                                        | Left cardiac catheterization                                                                                                                                                                                                                                                                            |
| 50.71C                                                                                                                       | Balloon embolization of carotidocavernous fistula Includes intraoperative angiograms                                                                                                                                                                                                                    |
| 50.79A                                                                                                                       | Vascular occlusion by catheter, to include intraoperative angiograms, any area                                                                                                                                                                                                                          |
| 50.8                                                                                                                         | Selective angiography using contrast material                                                                                                                                                                                                                                                           |
| 51.59A                                                                                                                       | Open transluminal angioplasty                                                                                                                                                                                                                                                                           |
| 51.59B                                                                                                                       | Percutaneous transluminal angioplasty, excluding coronary vessels                                                                                                                                                                                                                                       |
| 51.59D                                                                                                                       | Percutaneous transluminal coronary angioplasty with associated diagnostic angiogram                                                                                                                                                                                                                     |
| 51.99B                                                                                                                       | Percutaneous removal or lysis of embolus or thrombus in any vessel                                                                                                                                                                                                                                      |



**eTable 4. Cohort Formation, Applying the >90 Days Chronicity Criterion**

|                                                                                                                                                         |                 |                     |                   |
|---------------------------------------------------------------------------------------------------------------------------------------------------------|-----------------|---------------------|-------------------|
| Number of residents registered in Alberta Health Apr 1, 1994 – Mar 31, 2017                                                                             | 4,983,956       |                     |                   |
| <b>Common exclusion criteria (N excluded):</b>                                                                                                          | 4,644,966       |                     |                   |
| • No serum creatinine measurements (available May 1, 2002 – Mar 31, 2017)                                                                               | 1,573,084       |                     |                   |
| • No outpatient serum creatinine measurements                                                                                                           | 201,969         |                     |                   |
| • All outpatient serum creatinine were tested under 18 years old                                                                                        | 31,971          |                     |                   |
| • All outpatient serum creatinine measurements were tested after the earliest of death, out-migration, registration end or accrual end (March 31, 2017) | 6,099           |                     |                   |
| • Never had an outpatient eGFR measurement <60 mL/min/1.73 m <sup>2</sup>                                                                               | 2,697,464       |                     |                   |
| • Only 1 outpatient eGFR <60 mL/min/1.73 m <sup>2</sup>                                                                                                 | 129,412         |                     |                   |
| • The first eGFR less than 60 was already <15 mL/min/1.73 m <sup>2</sup>                                                                                | 4,967           |                     |                   |
| <b>CKD stage</b>                                                                                                                                        | <b>Mild CKD</b> | <b>Moderate CKD</b> | <b>Severe CKD</b> |
| <b>Unique exclusion criteria (N excluded):</b>                                                                                                          | 257,670         | 303,061             | 326,753           |
| • Did not meet the sustained eGFR criterion for a specific stage, for >90 d                                                                             | 130,257         | 246,755             | 307,004           |
| • Index date was not between Apr 1, 2009 and Mar 31, 2015                                                                                               | 126,787         | 55,644              | 19,030            |
| • Index date was on the earliest date of death, out-migration, registration end or accrual end                                                          | 72              | 21                  | 10                |
| • At least 1 outpatient eGFR <15 mL/min/1.73 m <sup>2</sup> prior to the qualifying period                                                              | 83              | 193                 | 342               |
| • Initiated kidney replacement therapy on or prior to index date                                                                                        | 471             | 448                 | 367               |
| <b>Cohort size (N)</b>                                                                                                                                  | <b>81,320</b>   | <b>35,929</b>       | <b>12,237</b>     |

Note:

- 1) Our population registry started in 1994. Serum creatinine data started on May 1, 2002, with nearly complete coverage (~98% of the Alberta population) from July 1, 2003 and complete coverage from January 1, 2005. The ~1/3 of the population (n=1,573,084) who never had an eGFR measurement largely comprises people who were in the registry before the study start date (April 1, 2009). We considered all the available information preceding Apr 1, 2009 (look-back window for eGFR measurements and other data) to minimize the inclusion of prevalent cases in the incident CKD cohorts between Apr 1, 2009 and Mar 31, 2015.
- 2) Of those who were registered for at least 1 fiscal year between Apr 1, 2009 and Mar 31, 2015, 20% did not have a serum creatinine measurement. Most of these (~85%) were younger than 40 years, an expected figure considering that a screening test for serum creatinine wouldn't normally be recommended for most people under 40 unless they are at increased risk of developing CKD.

**eTable 5. Summary of Follow-up Times and Outcomes**

| <b>CKD stage</b>                       | <b>Mild CKD</b>  | <b>Moderate CKD</b> | <b>Severe CKD</b> |
|----------------------------------------|------------------|---------------------|-------------------|
| <b>Initial cohort</b>                  |                  |                     |                   |
| N                                      | 81,320           | 35,929              | 12,237            |
| Follow-up years, median (IQR)          | 3.44 (2.25–5.00) | 2.80 (1.59–4.34)    | 2.15 (0.99–3.48)  |
| Outcomes, n (%)                        |                  |                     |                   |
| Censored                               | 51,205 (63.0)    | 16,422 (45.7)       | 3,635 (29.7)      |
| Regression                             | 10,052 (12.4)    | 6,021 (16.8)        | 2,173 (17.8)      |
| Progression                            | 9,605 (11.8)     | 4,895 (13.6)        | -                 |
| Kidney failure (eGFR)                  | 6 (0.01)         | 30 (0.08)           | 1,818 (14.9)      |
| Kidney failure (kidney replacement)    | 28 (0.03)        | 72 (0.20)           | 370 (3.0)         |
| Death                                  | 10,424 (12.8)    | 8,489 (23.6)        | 4,241 (34.7)      |
| <b>Sub-cohort following regression</b> |                  |                     |                   |
| N                                      | 10,052           | 6,021               | 2,173             |
| Follow-up years, median (IQR)          | 1.90 (0.96–3.29) | 1.77 (0.88–3.04)    | 1.65 (0.85–2.83)  |
| Outcomes, n (%)                        |                  |                     |                   |
| Censored                               | 6,775 (67.4)     | 3,360 (55.8)        | 1,042 (48.0)      |
| Further regression                     | -                | 236 (3.9)           | 97 (4.5)          |
| Progression                            | 1,564 (15.6)     | 1,102 (18.3)        | 409 (18.8)        |
| Kidney failure (eGFR)                  | 0                | 0                   | 1 (0.05)          |
| Kidney failure (kidney replacement)    | 1 (0.01)         | 0                   | 0                 |
| Death                                  | 1,712 (17.0)     | 1,323 (22.0)        | 624 (28.7)        |

**eTable 6. Incidence Rate Ratios (95% CIs) of Outpatient eGFR Measurements During Follow-up by Age**

| <b>CKD stage</b>                         | <b>Mild CKD</b>  | <b>Moderate CKD</b> | <b>Severe CKD</b> |
|------------------------------------------|------------------|---------------------|-------------------|
| Baseline incidence rate, per person-year | 3.00 (2.97–3.04) | 5.69 (5.55–5.82)    | 9.30 (8.99–9.61)  |
| Age categories, years                    |                  |                     |                   |
| 18-64                                    | Reference        | Reference           | Reference         |
| 65-74                                    | 0.92 (0.91–0.94) | 0.85 (0.83–0.88)    | 0.91 (0.87–0.95)  |
| 75-84                                    | 0.89 (0.88–0.91) | 0.74 (0.72–0.76)    | 0.80 (0.77–0.83)  |
| ≥85                                      | 0.88 (0.86–0.90) | 0.64 (0.62–0.66)    | 0.64 (0.61–0.67)  |

Estimates were derived from negative binomial regression.

**eTable 7. Proportions and Outcomes of Cohort Members With a Single Outpatient eGFR Measurement During Follow-up**

| Initial cohort                                         | Mild CKD    |             | Moderate CKD |             | Severe CKD |            |
|--------------------------------------------------------|-------------|-------------|--------------|-------------|------------|------------|
|                                                        | All         | Age ≥65 y   | All          | Age ≥65 y   | All        | Age ≥65 y  |
| N                                                      | 81 320      | 61 646      | 35 929       | 30 998      | 12 237     | 10 041     |
| <i>Only had 1 follow-up eGFR</i>                       | 4891 (6.0)  | 3783 (6.1)  | 1704 (4.7)   | 1592 (5.1)  | 555 (4.5)  | 531 (5.3)  |
| Outcomes                                               |             |             |              |             |            |            |
| Censored                                               | 3358 (68.7) | 2366 (62.5) | 680 (39.9)   | 605 (38.0)  | 100 (18.0) | 88 (16.6)  |
| Regression                                             | -           | -           | -            | -           | -          | -          |
| Progression                                            | -           | -           | -            | -           | -          | -          |
| Kidney failure                                         | -           | -           | -            | -           | -          | -          |
| Death                                                  | 1533 (31.3) | 1417 (37.5) | 1024 (60.1)  | 987 (62.0)  | 455 (82.0) | 443 (83.4) |
| <i>The follow-up eGFR:</i>                             |             |             |              |             |            |            |
| Same eGFR category                                     | 2806 (57.4) | 2198 (58.1) | 420 (24.6)   | 379 (23.8)  | 4 (0.7)    | 4 (0.8)    |
| Drop in eGFR category                                  | 603 (12.3)  | 537 (14.2)  | 1232 (72.3)  | 1167 (73.3) | 547 (98.6) | 524 (98.7) |
| Increase in eGFR category                              | 1482 (30.3) | 1048 (27.7) | 52 (3.1)     | 46 (2.9)    | 4 (0.7)    | 3 (0.6)    |
| <i>The follow-up eGFR:</i>                             |             |             |              |             |            |            |
| Drop in eGFR category + 25% decrease from baseline     | 4           | 4           | 8            | 6           | 4          | 4          |
| Increase in eGFR category + 25% increase from baseline | 451         | 331         | 52           | 46          | 4          | 3          |

Values are presented in number or number (percent).

**eTable 8. Baseline Characteristics, by CKD Stage (Moving Average eGFR Method)**

| <b>Cohorts</b>                                                       | <b>Mild CKD<br/>(N=81,182)</b> | <b>Moderate CKD<br/>(N=48,166)</b> | <b>Severe CKD<br/>(N=17,555)</b> |
|----------------------------------------------------------------------|--------------------------------|------------------------------------|----------------------------------|
| Age, in years, mean (SD)                                             | 72.4 (11.3)                    | 76.3 (11.8)                        | 76.7 (13.6)                      |
| 18-64                                                                | 19,674 (24.2)                  | 7,561 (15.7)                       | 3,046 (17.4)                     |
| 65-74                                                                | 25,937 (32.0)                  | 11,638 (24.2)                      | 3,312 (18.9)                     |
| 75-84                                                                | 25,402 (31.3)                  | 17,621 (36.6)                      | 5,979 (34.1)                     |
| ≥85                                                                  | 10,169 (12.5)                  | 11,346 (23.6)                      | 5,218 (29.7)                     |
| Men                                                                  | 36,422 (44.9)                  | 21,443 (44.5)                      | 8,036 (45.8)                     |
| <b>Kidney health measures</b>                                        |                                |                                    |                                  |
| Index eGFR, mean (SD)                                                | 53.8 (3.6)                     | 41.7 (3.2)                         | 27.5 (2.7)                       |
| Qualifying period, days, median (IQR)                                | 266 (149 - 427)                | 197 (121 - 369)                    | 144 (105 - 242)                  |
| ≤365                                                                 | 53,235 (65.6)                  | 35,896 (74.5)                      | 15,194 (86.6)                    |
| >365 to ≤455                                                         | 14,509 (17.9)                  | 6,205 (12.9)                       | 1,214 (6.9)                      |
| >455 to ≤730                                                         | 5,402 (6.7)                    | 2,362 (4.9)                        | 500 (2.8)                        |
| >730                                                                 | 8,036 (9.9)                    | 3,703 (7.7)                        | 647 (3.7)                        |
| Qualifying period, number of outpatient eGFR measurements, mean (SD) | 2 (1)                          | 3 (2)                              | 4 (2)                            |
| Prior outpatient eGFR                                                |                                |                                    |                                  |
| Unmeasured                                                           | 6,924 (8.5)                    | 3,136 (6.5)                        | 692 (3.9)                        |
| ≥60                                                                  | 74,258 (91.5)                  | 11,298 (23.5)                      | 893 (5.1)                        |
| ≥45 to <60                                                           | 0                              | 32,344 (67.2)                      | 2,534 (14.4)                     |
| ≥30 to <45                                                           | 0                              | 1,387 (2.9)                        | 13,020 (74.2)                    |
| ≥15 to <30                                                           | 0                              | 1 (0)                              | 416 (2.4)                        |
| Albuminuria <sup>a</sup>                                             |                                |                                    |                                  |
| Unmeasured                                                           | 4,197 (5.2)                    | 2,311 (4.8)                        | 626 (3.6)                        |
| Normal or mild                                                       | 63,030 (77.6)                  | 31,831 (66.1)                      | 8,340 (47.5)                     |
| Moderate                                                             | 9,864 (12.2)                   | 9,005 (18.7)                       | 4,397 (25.1)                     |
| Severe                                                               | 4,091 (5.0)                    | 5,019 (10.4)                       | 4,192 (23.9)                     |
| <b>Comorbidities</b>                                                 |                                |                                    |                                  |
| Diabetes                                                             | 23,619 (29.1)                  | 18,648 (38.7)                      | 8,568 (48.8)                     |
| Hypertension                                                         | 62,430 (76.9)                  | 42,647 (88.5)                      | 16,288 (92.8)                    |
| Cardiovascular disease                                               | 25,042 (30.8)                  | 22,025 (45.7)                      | 10,082 (57.4)                    |
| Congestive heart failure                                             | 11,775 (14.5)                  | 12,909 (26.8)                      | 7,037 (40.1)                     |
| Myocardial infarction                                                | 5,176 (6.4)                    | 4,577 (9.5)                        | 2,061 (11.7)                     |
| Peripheral vascular disease                                          | 2,925 (3.6)                    | 2,856 (5.9)                        | 1,394 (7.9)                      |
| Stroke or TIA                                                        | 12,662 (15.6)                  | 10,541 (21.9)                      | 4,585 (26.1)                     |
| Cancer                                                               | 10,994 (13.5)                  | 7,912 (16.4)                       | 3,154 (18.0)                     |
| Lymphoma                                                             | 1,047 (1.3)                    | 926 (1.9)                          | 447 (2.5)                        |
| Metastatic                                                           | 2,530 (3.1)                    | 2,050 (4.3)                        | 838 (4.8)                        |
| Non-metastatic                                                       | 9,426 (11.6)                   | 6,623 (13.8)                       | 2,564 (14.6)                     |
| Dementia                                                             | 5,710 (7.0)                    | 5,566 (11.6)                       | 2,566 (14.6)                     |

|                                                 |               |               |               |
|-------------------------------------------------|---------------|---------------|---------------|
| <b>Indicators of acute conditions</b>           |               |               |               |
| Hospitalization                                 | 4,793 (5.9)   | 5,921 (12.3)  | 3,350 (19.1)  |
| Emergency department visit                      | 10,832 (13.3) | 10,193 (21.2) | 4,928 (28.1)  |
| Receipt of angiogram or cardiac catheterization | 594 (0.7)     | 648 (1.3)     | 225 (1.3)     |
| <b>Drugs dispensed</b>                          |               |               |               |
| ACEI or ARBs                                    | 49,540 (61.0) | 36,008 (74.8) | 13,906 (79.2) |
| Statins                                         | 34,294 (42.2) | 23,280 (48.3) | 9,339 (53.2)  |
| NSAIDs                                          | 17,998 (22.2) | 10,846 (22.5) | 3,005 (17.1)  |

Abbreviations: ACEI/ARBs, angiotensin-converting enzyme inhibitor or angiotensin receptor blockers; CKD, chronic kidney disease; eGFR, estimated glomerular filtration rate (mL/min/1.73 m<sup>2</sup>); IQR, inter quartile range; NSAIDs, nonsteroidal anti-inflammatory drugs; SD, standard deviation; TIA, transient ischemic attack.

Values are number (%), otherwise stated.

<sup>a</sup>Albuminuria was categorized as normal/mild, moderate, severe or unmeasured, based on the most recent outpatient values, with the following types of measurement in descending order of preference: albumin-to-creatinine ratio (<30, 30 to 300, or >300 mg/g), protein-to-creatinine ratio (<150, 150 to 500, or >500 mg/g), and urine dipstick (negative or trace, 1+, or ≥2+).

## eFigure 1. Study Design

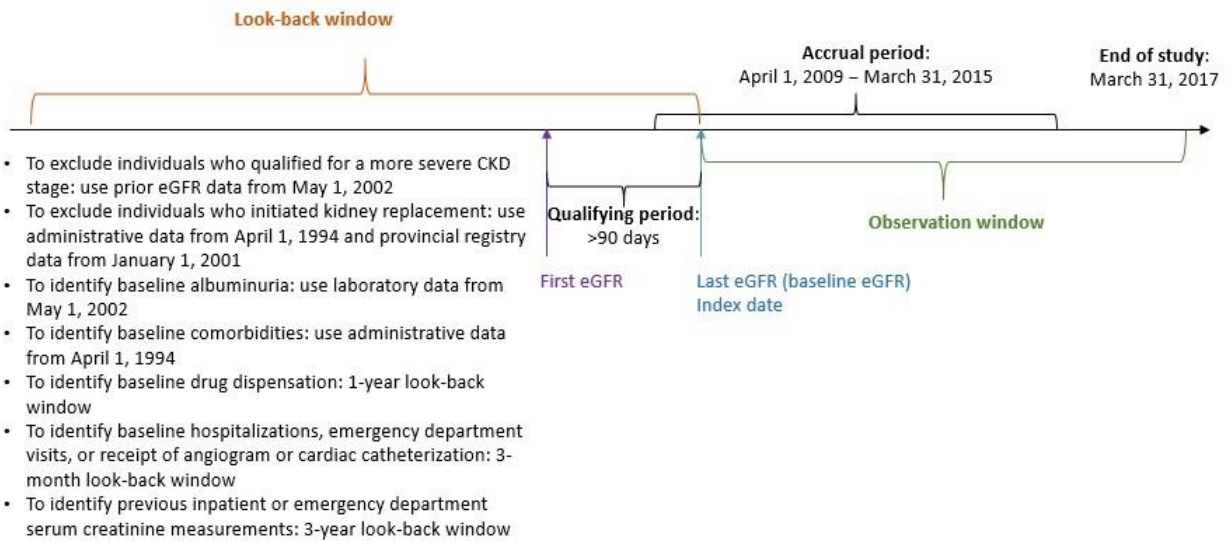

## eFigure 2. Values, Counts, and Rates of eGFR Measurements During the Qualifying Period, by Age Categories

### A) Values

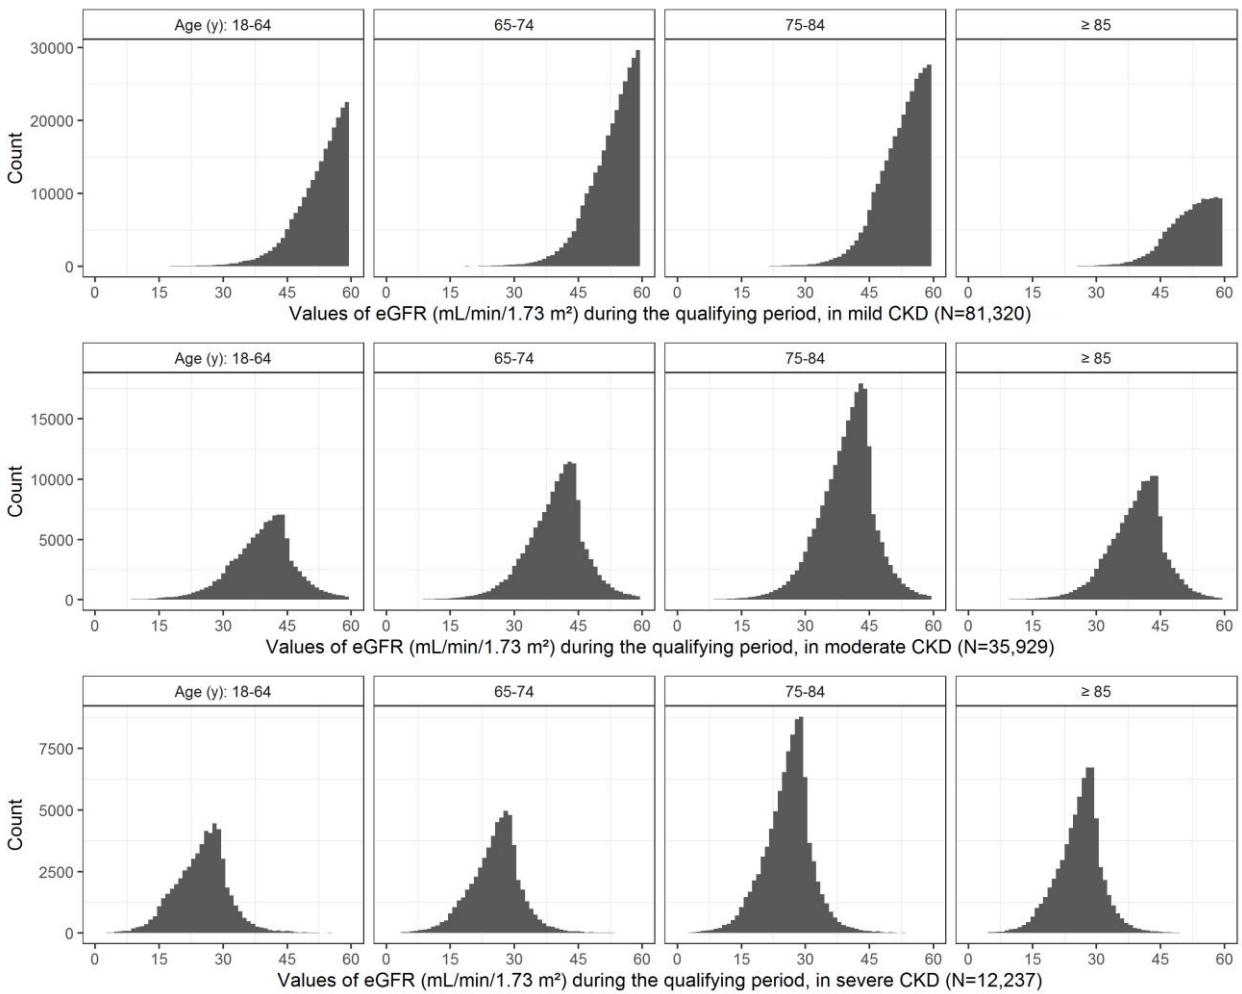



## B) Counts

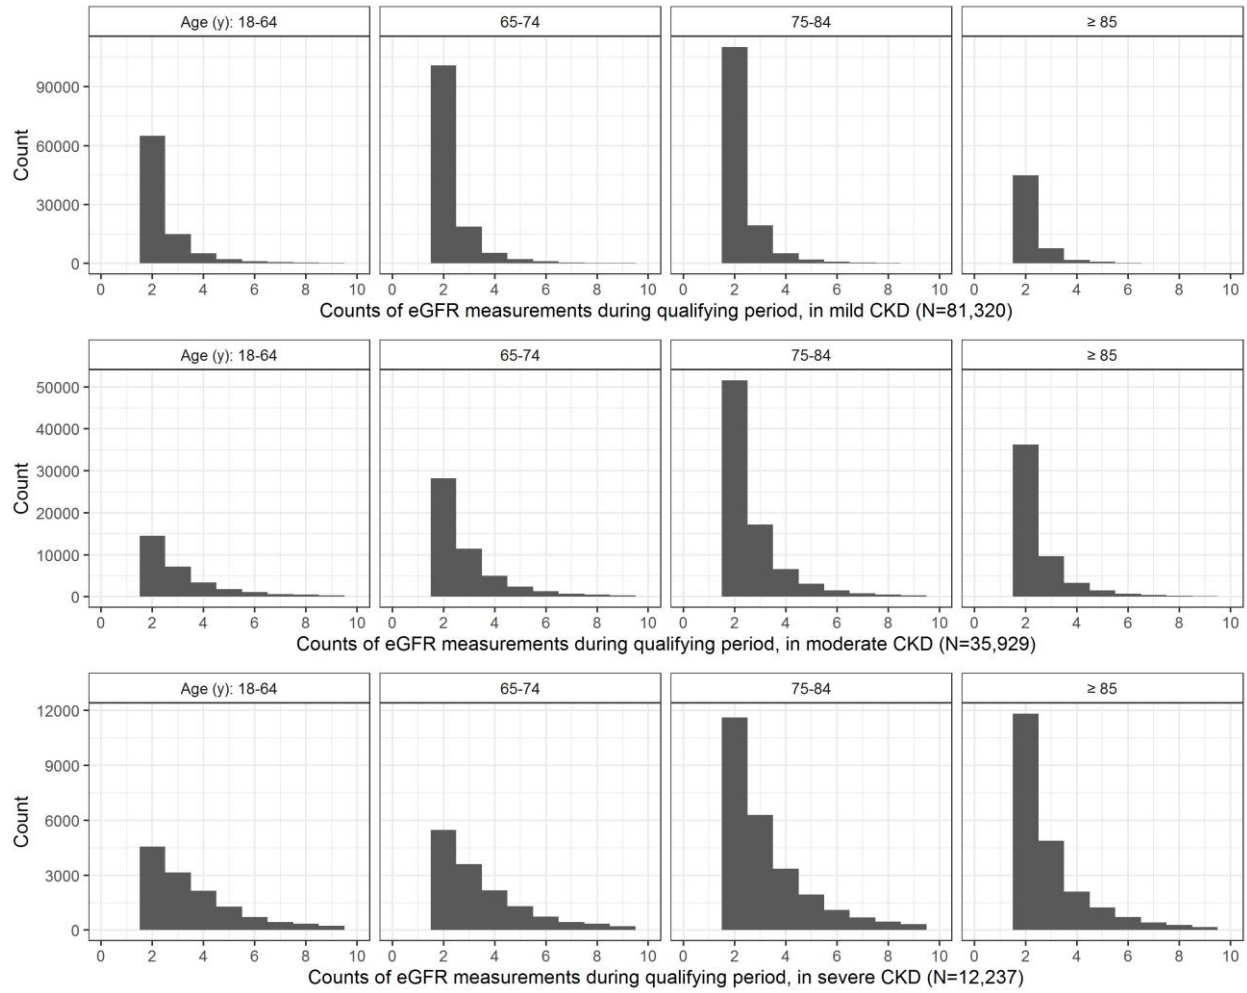

### C) Rates

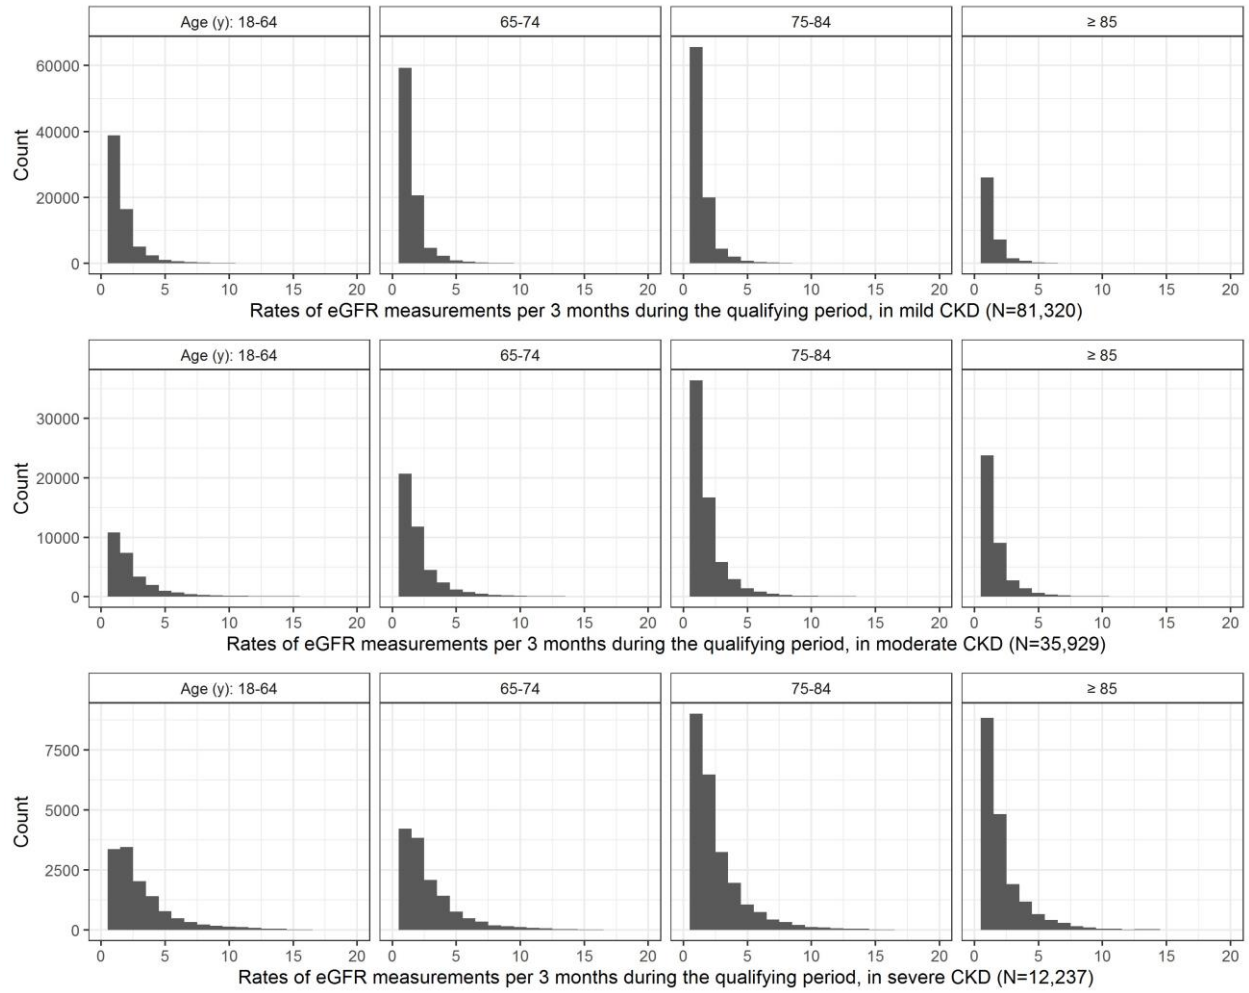

**eFigure 3. Number of Individuals, by Levels of Albuminuria and Age Categories**

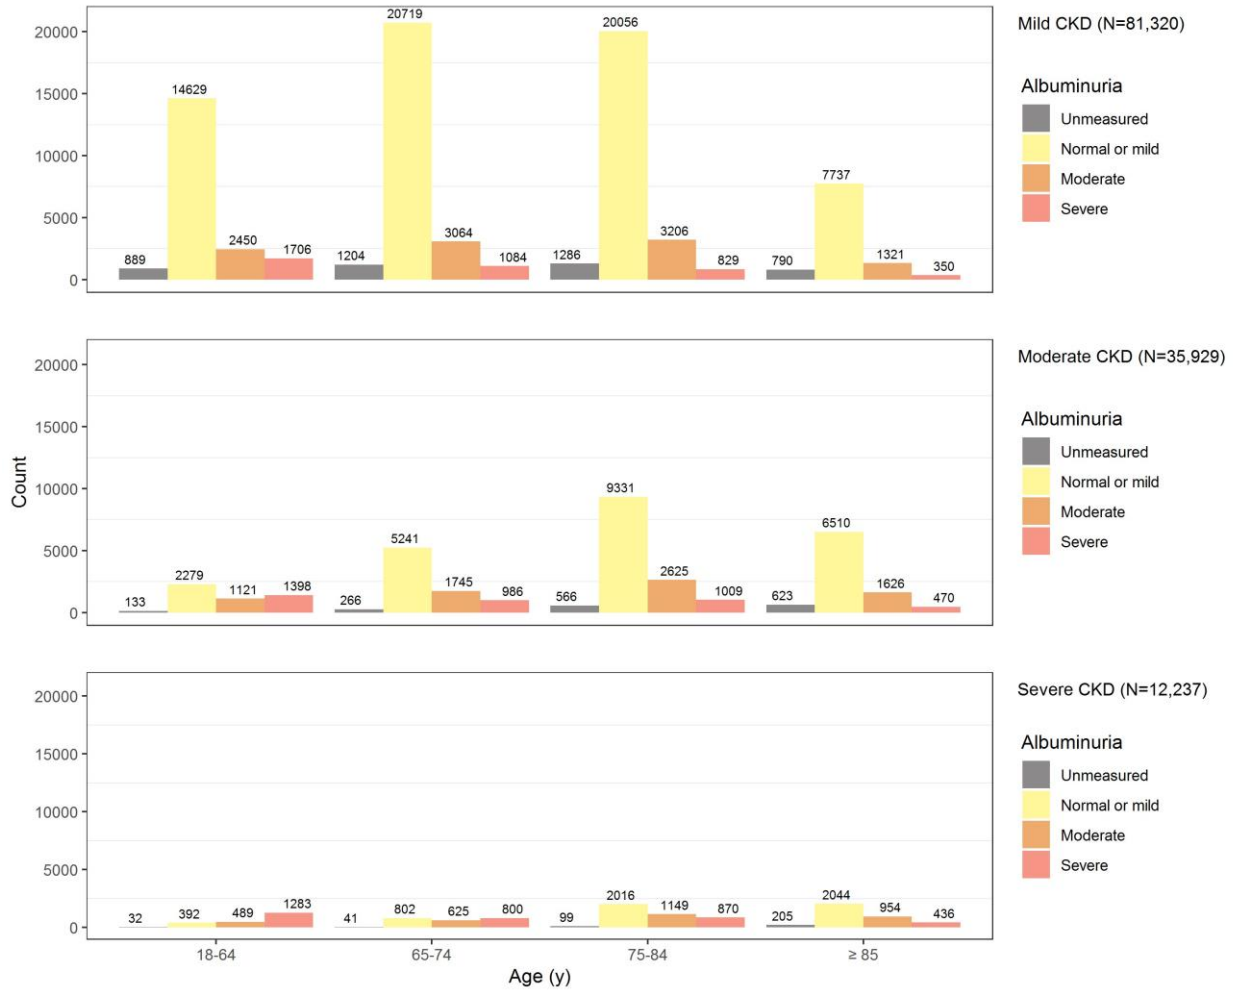

Legend: Albuminuria was categorized as normal/mild, moderate, severe or unmeasured, based on the most recent outpatient values, with the following types of measurement in descending order of preference: albumin-to-creatinine ratio (<30, 30 to 300, or >300 mg/g), protein-to-creatinine ratio (<150, 150 to 500, or >500 mg/g), and urine dipstick (negative or trace, 1+, or ≥2+).

**eFigure 4. Cumulative Incidence Functions Over Time From Initial CKD Stage**

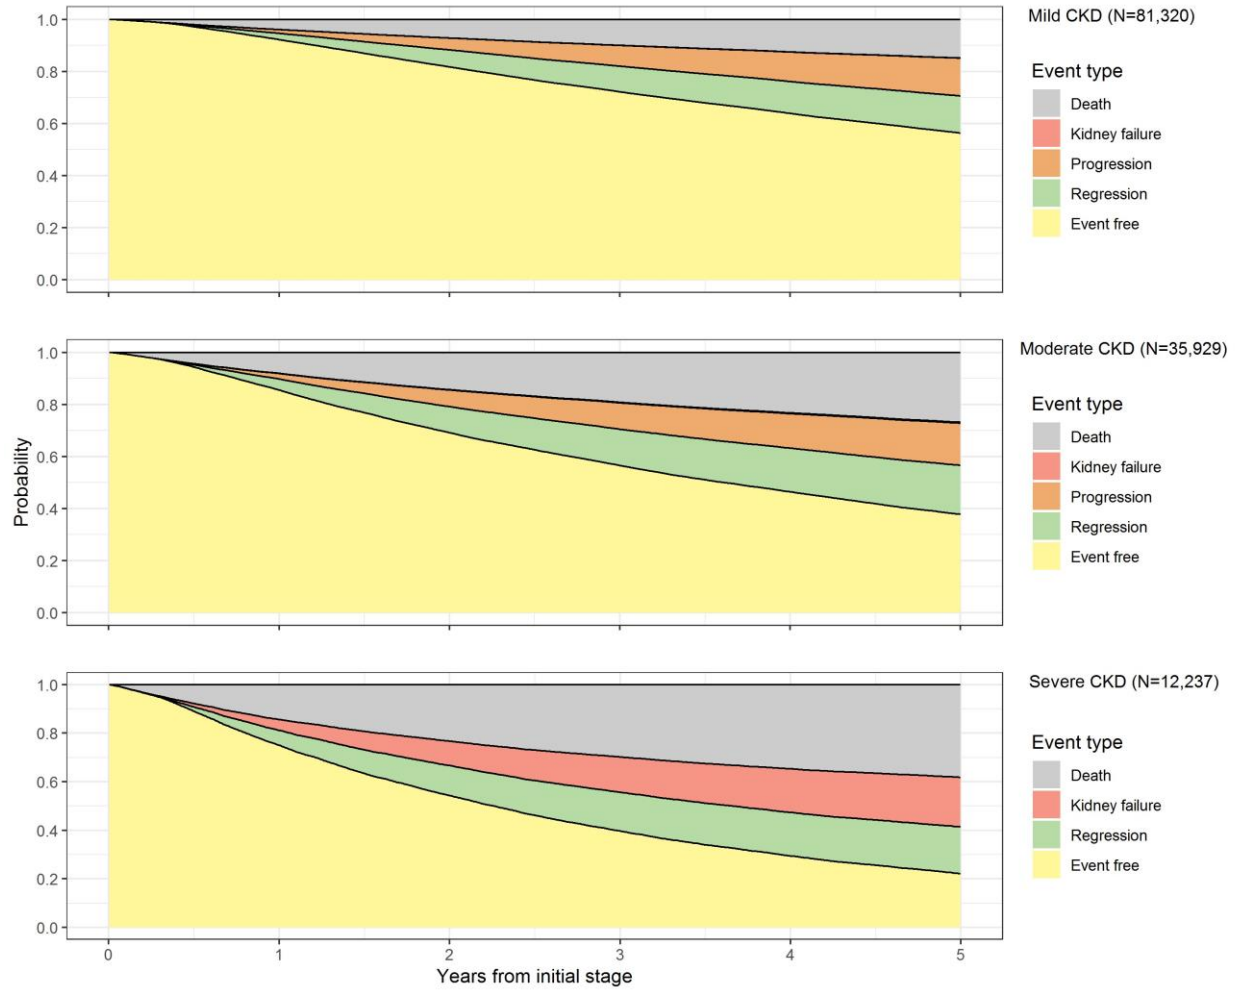

**eFigure 5. Probabilities of Outcomes at 5 Years From Initial CKD Stage, by Levels of Albuminuria and Age Categories at Baseline**

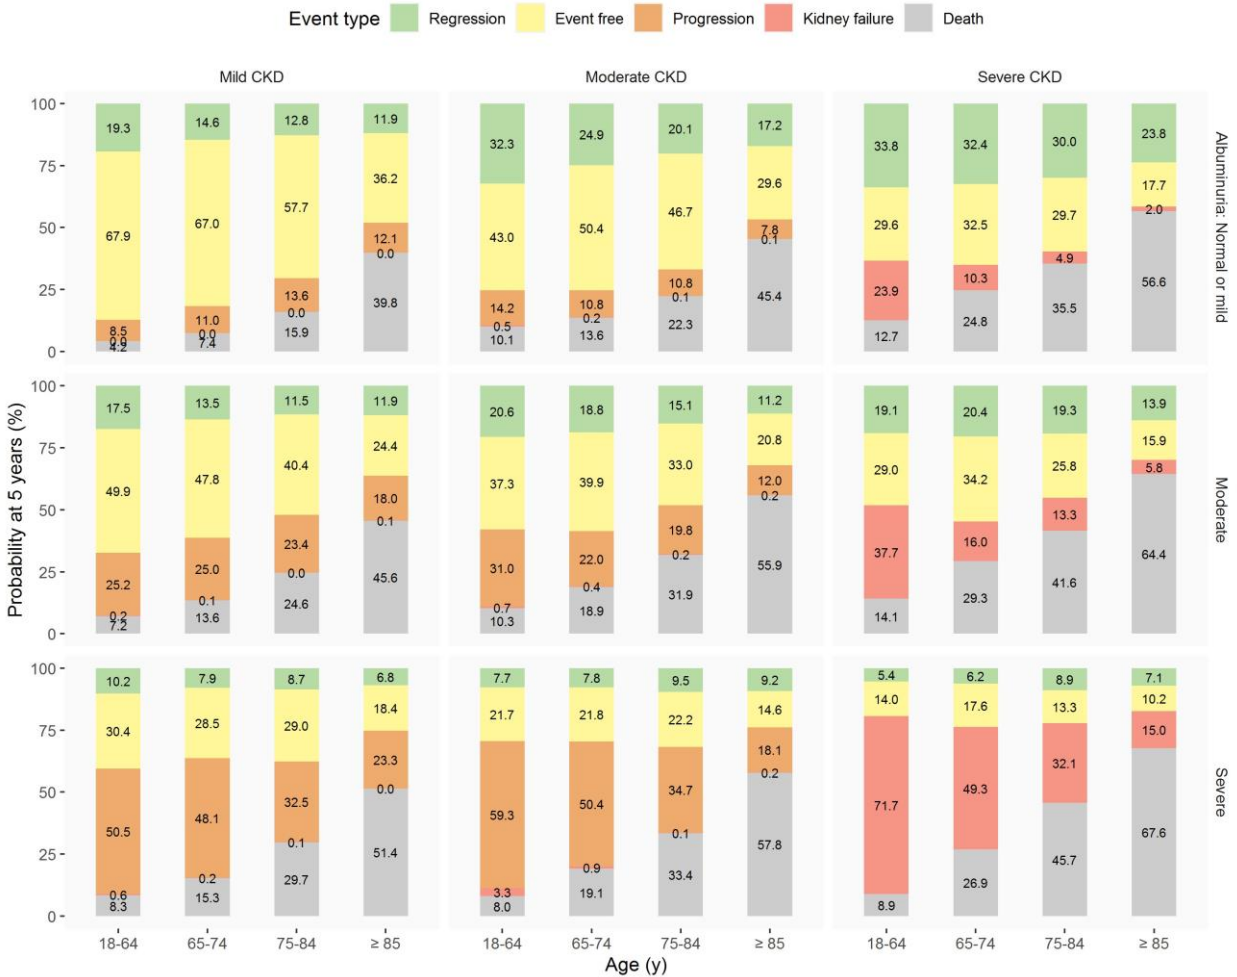

Legend: Albuminuria was categorized as normal/mild, moderate, or severe, based on the most recent outpatient values, with the following types of measurement in descending order of preference: albumin-to-creatinine ratio (<30, 30 to 300, or >300 mg/g), protein-to-creatinine ratio (<150, 150 to 500, or >500 mg/g), and urine dipstick (negative or trace, 1+, or ≥2+).

**eFigure 6. Probabilities of Outcomes at 5 Years From Initial CKD Stage, by Age Categories, in Those Without Inpatient or Emergency Department Serum Creatinine Measurements Within 3 Years Before Cohort Entry**

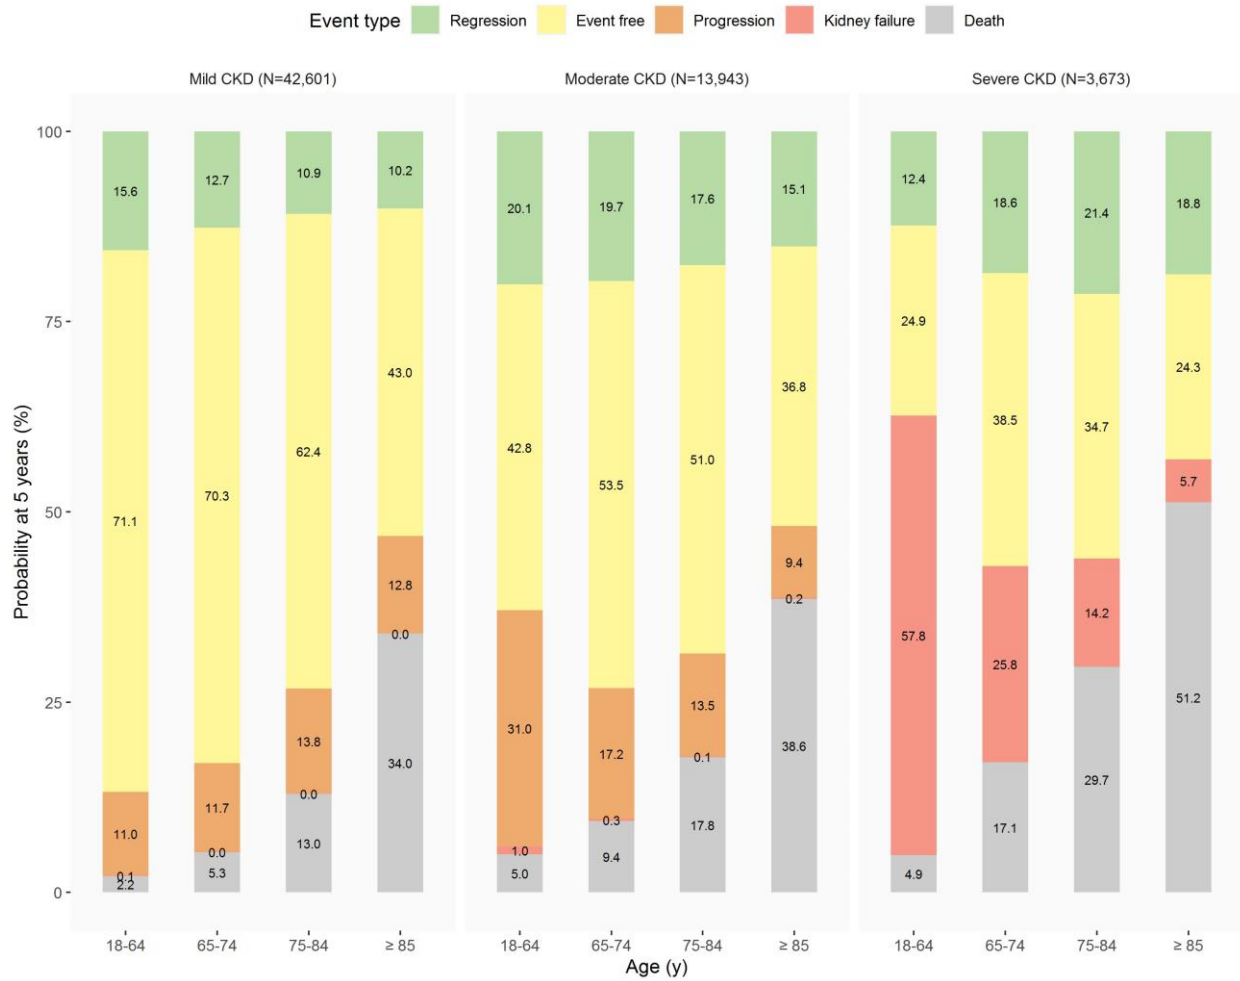

**eFigure 7. Probabilities of Outcomes at 5 Years From Initial CKD Stage, by Age Categories, in Those Without Hospitalizations Within 3 Months Before Cohort Entry**

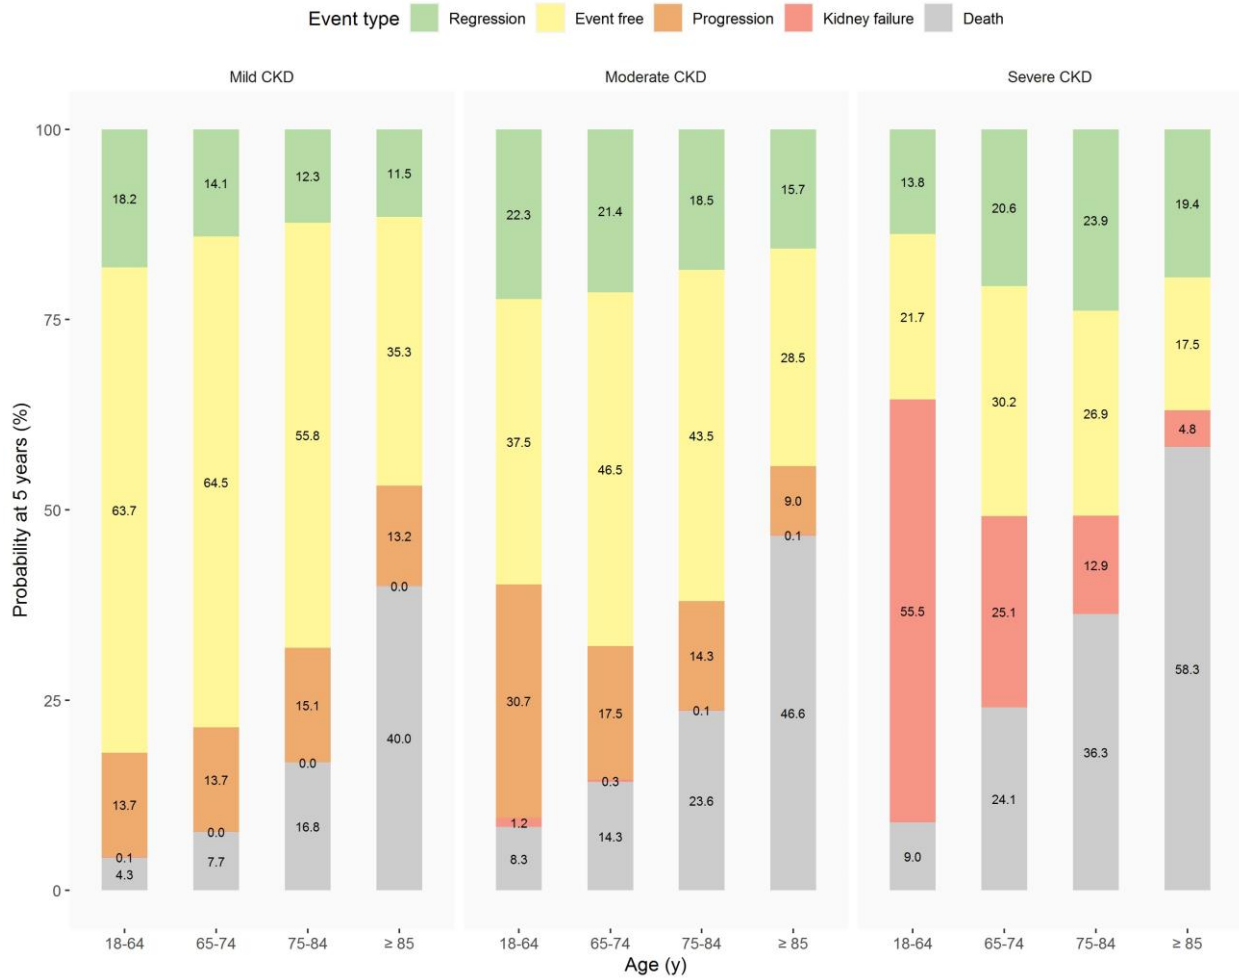

**eFigure 8. Probabilities of Outcomes at 5 Years From Initial CKD Stage, by Age Categories, in Those Without Emergency Department Visits Within 3 Months Before Cohort Entry**

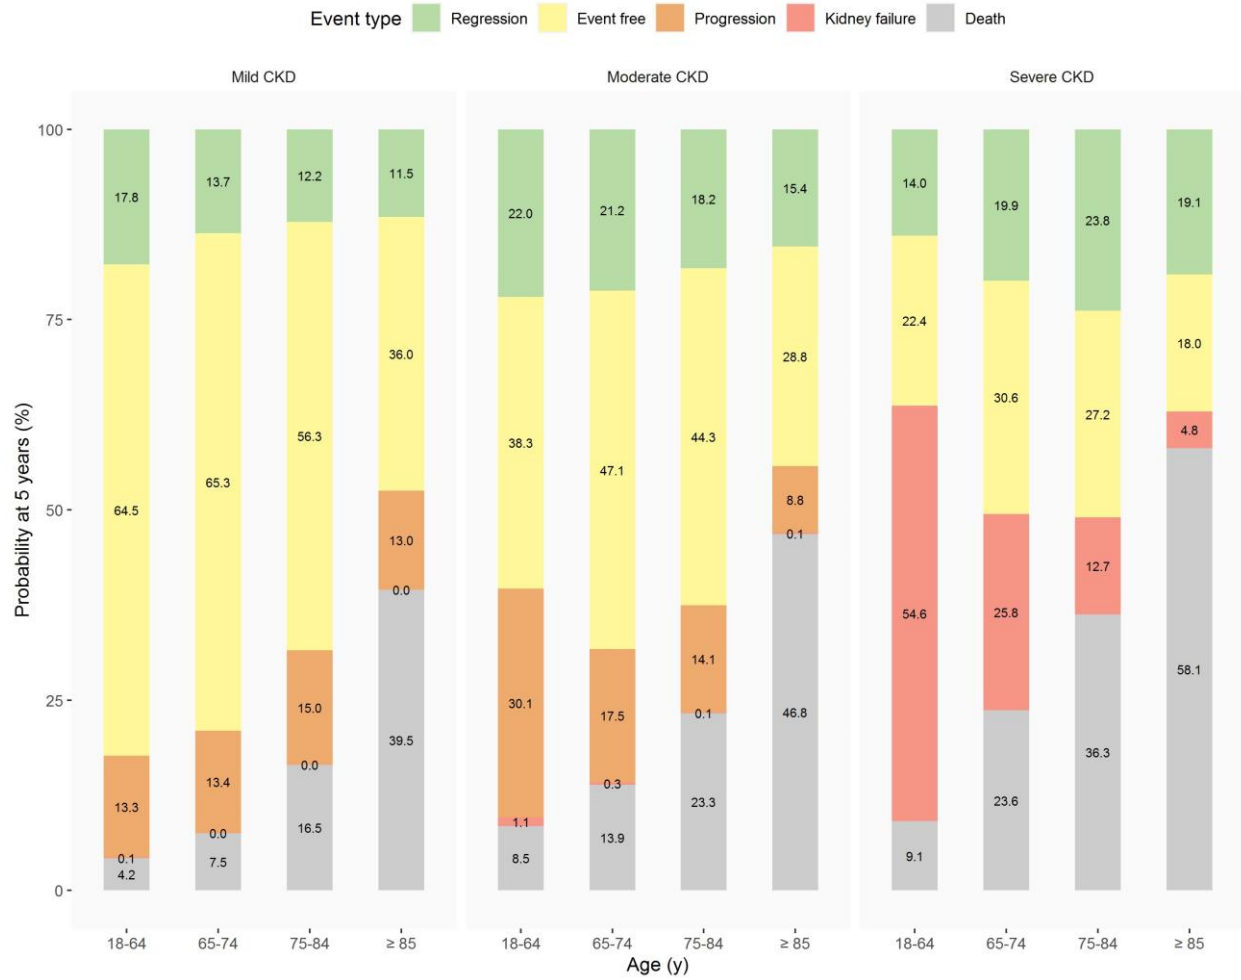



**eFigure 9. Probabilities of Outcomes at 5 Years From Initial CKD Stage, by Age Categories, in Those Without Receiving Angiogram or Cardiac Catheterization Within 3 Months Before Cohort Entry**

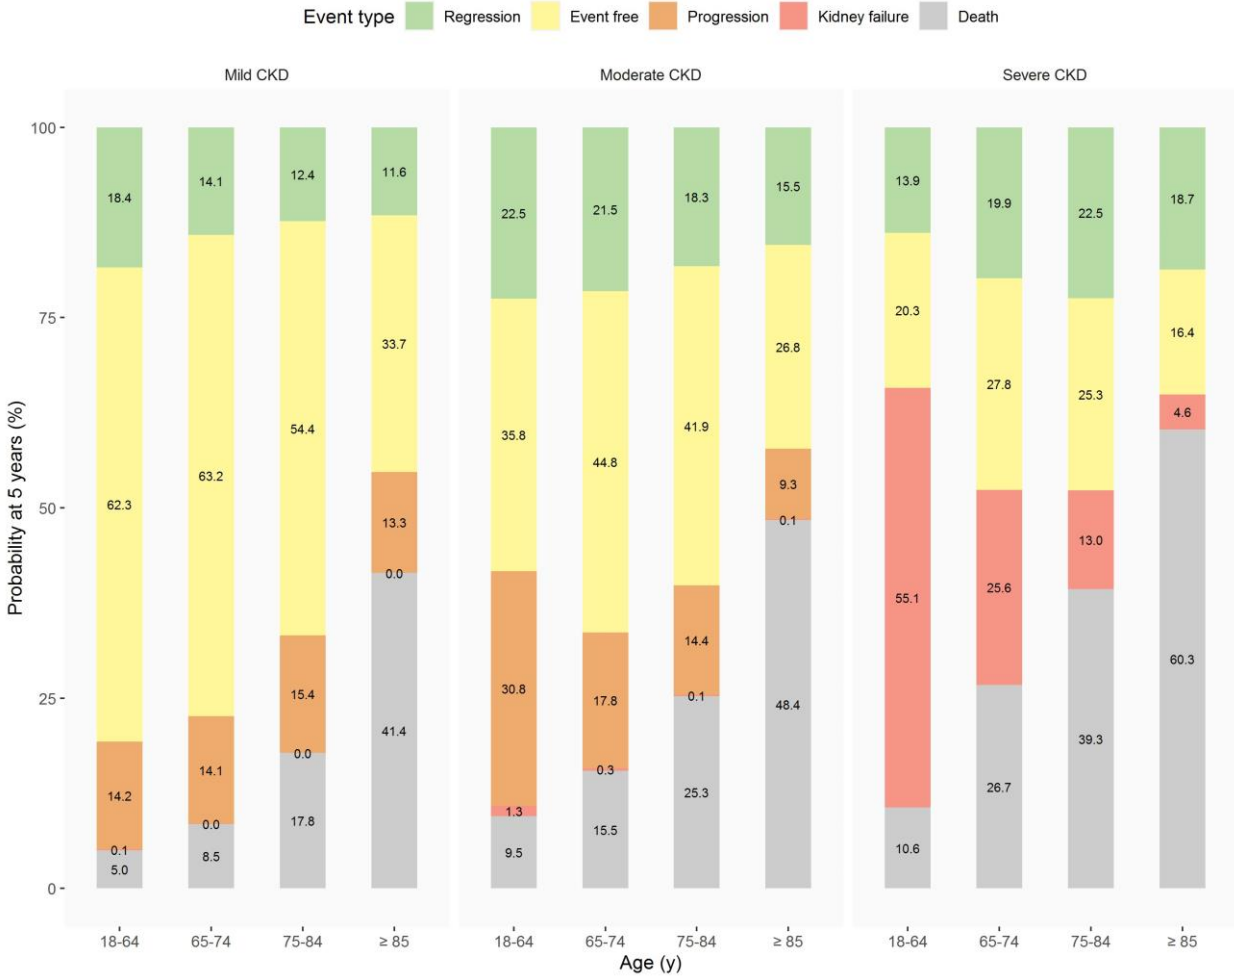

**eFigure 10. Probabilities of Outcomes at 5 Years From Initial CKD Stage, by Age Categories, in Those With No Events Within 1 Year or 2 Years**

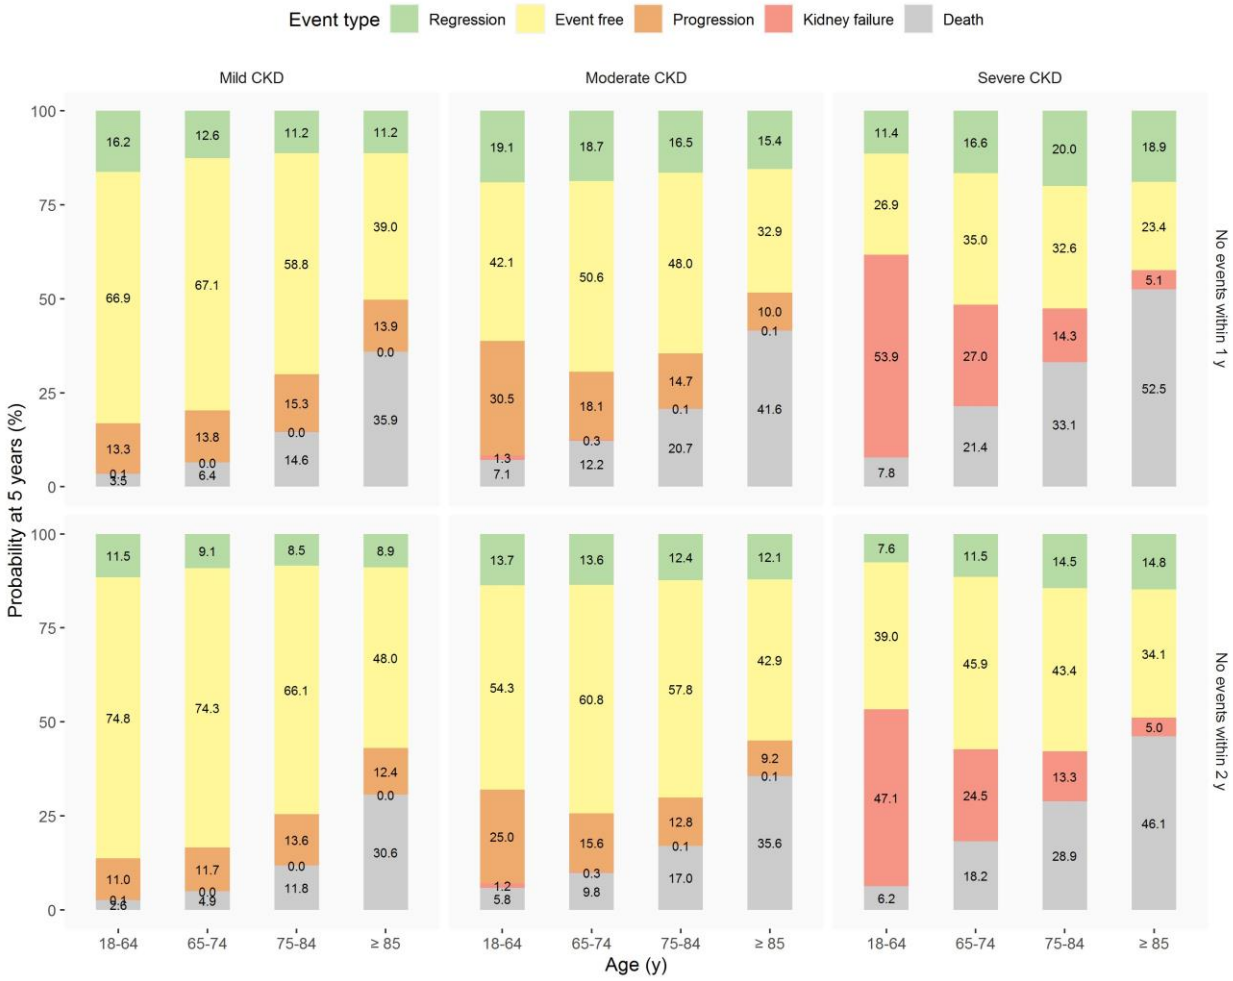

**eFigure 11. Probabilities of Outcomes at 5 Years From Initial CKD Stage, by Dispensation of ACEI/ARBs and Age Categories at Baseline**

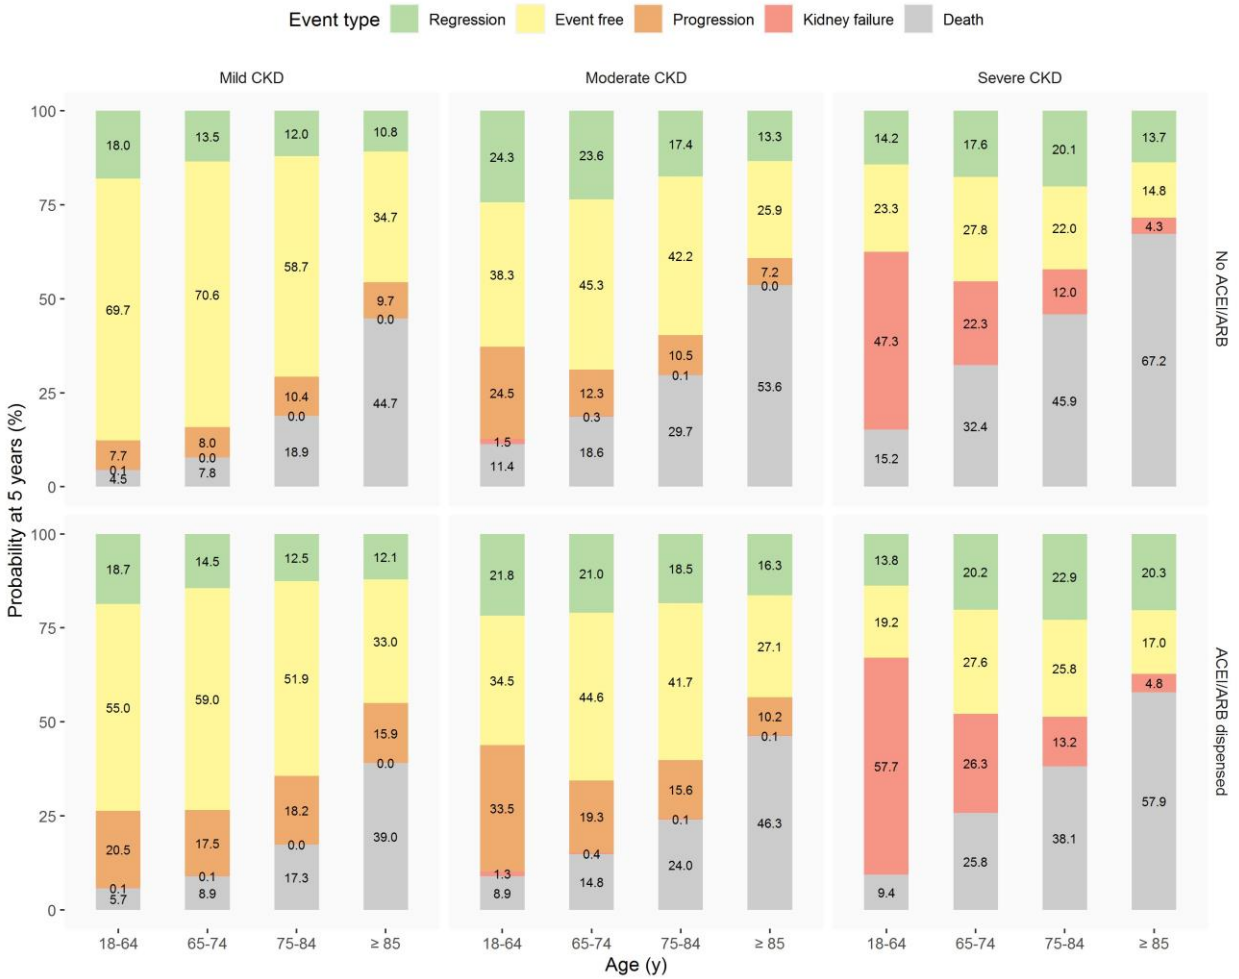

Abbreviations: ACEI/ARBs, angiotensin-converting enzyme inhibitor or angiotensin receptor blockers.

**eFigure 12. Probabilities of Outcomes at 5 Years From Initial CKD Stage, by Diabetes, Cardiovascular Disease, and Age Categories at Baseline**

**A) Mild CKD**

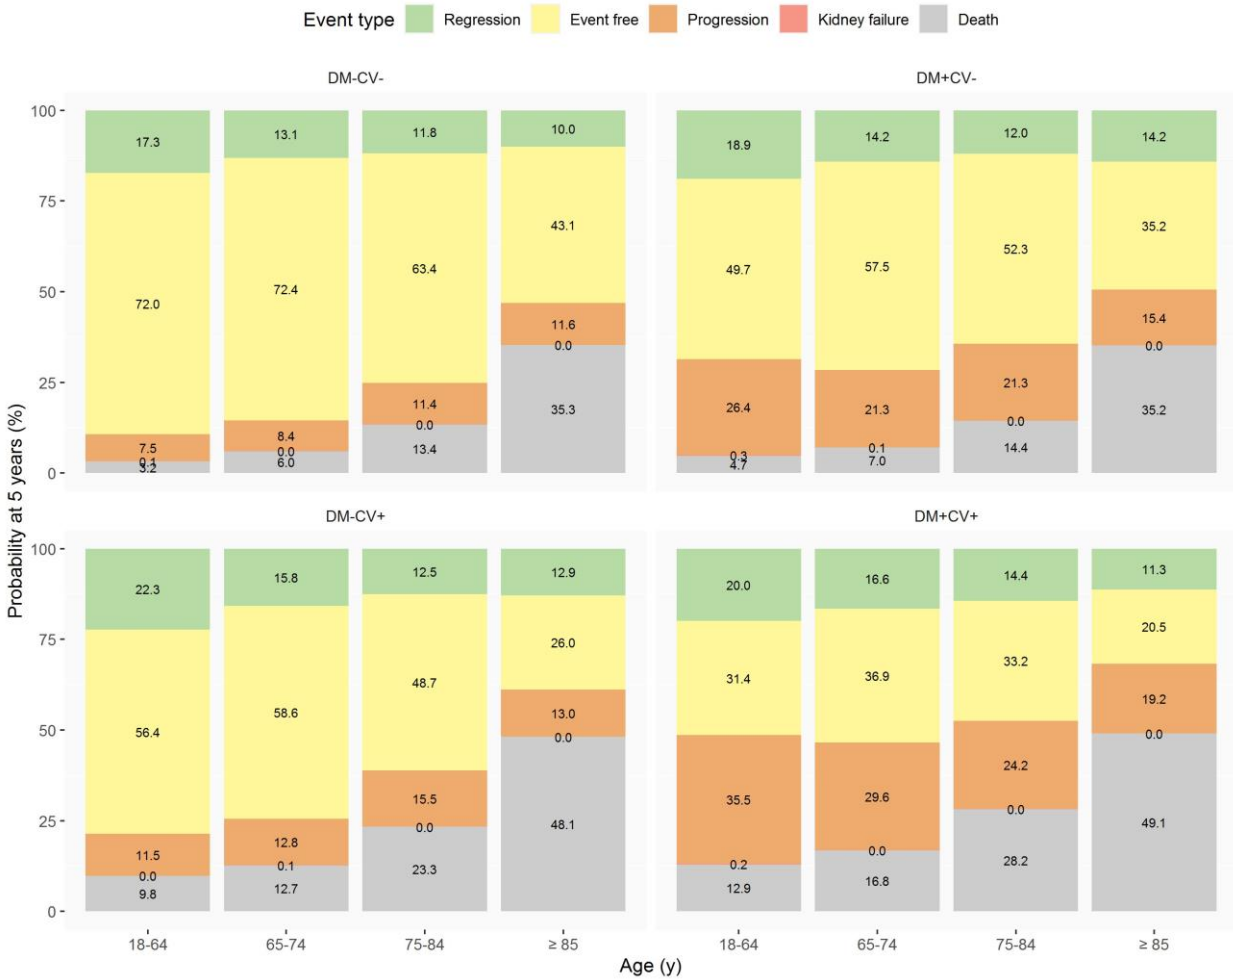

## B) Moderate CKD

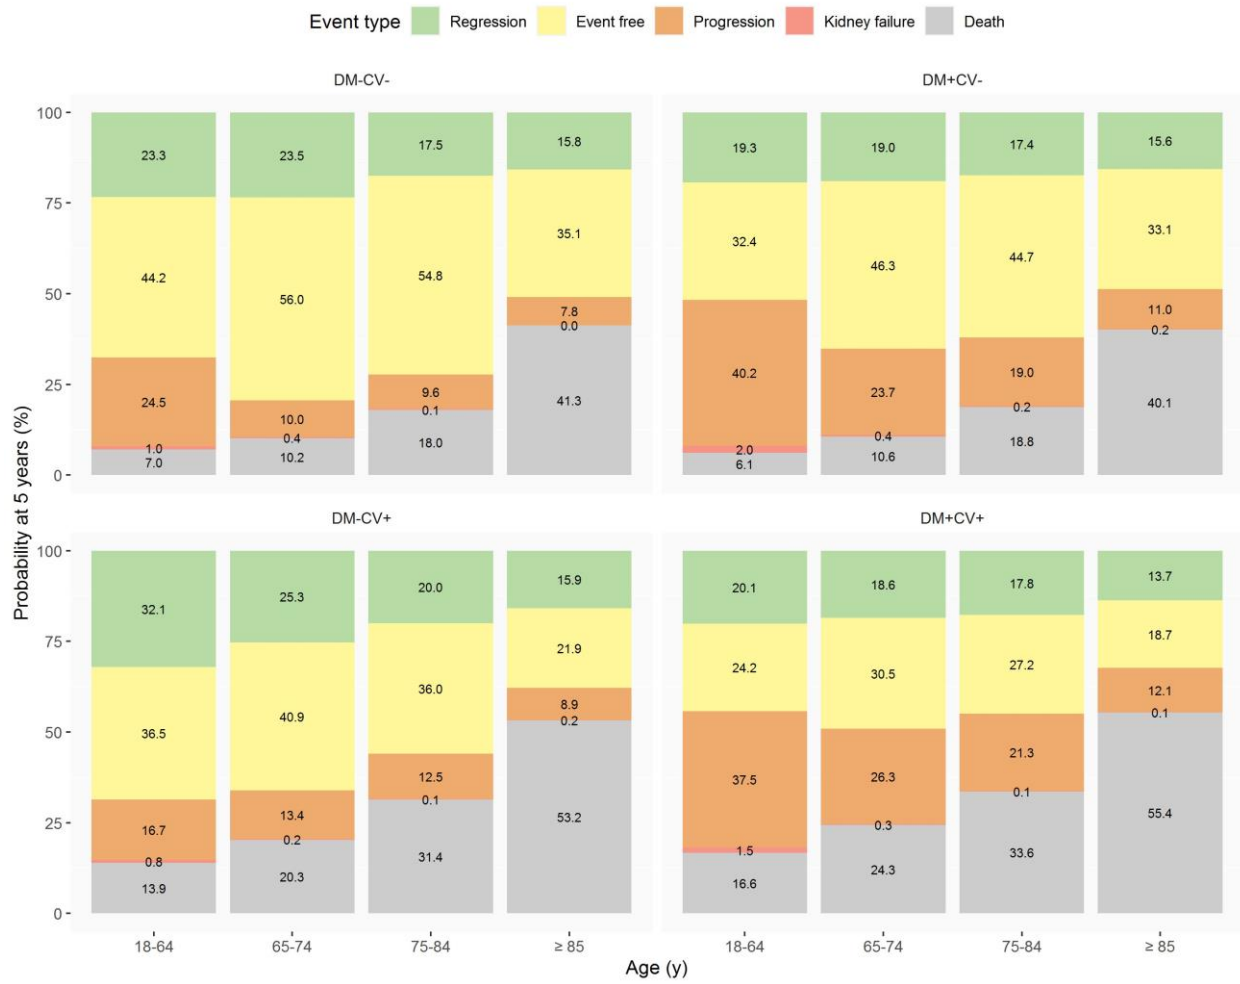

### C) Severe CKD

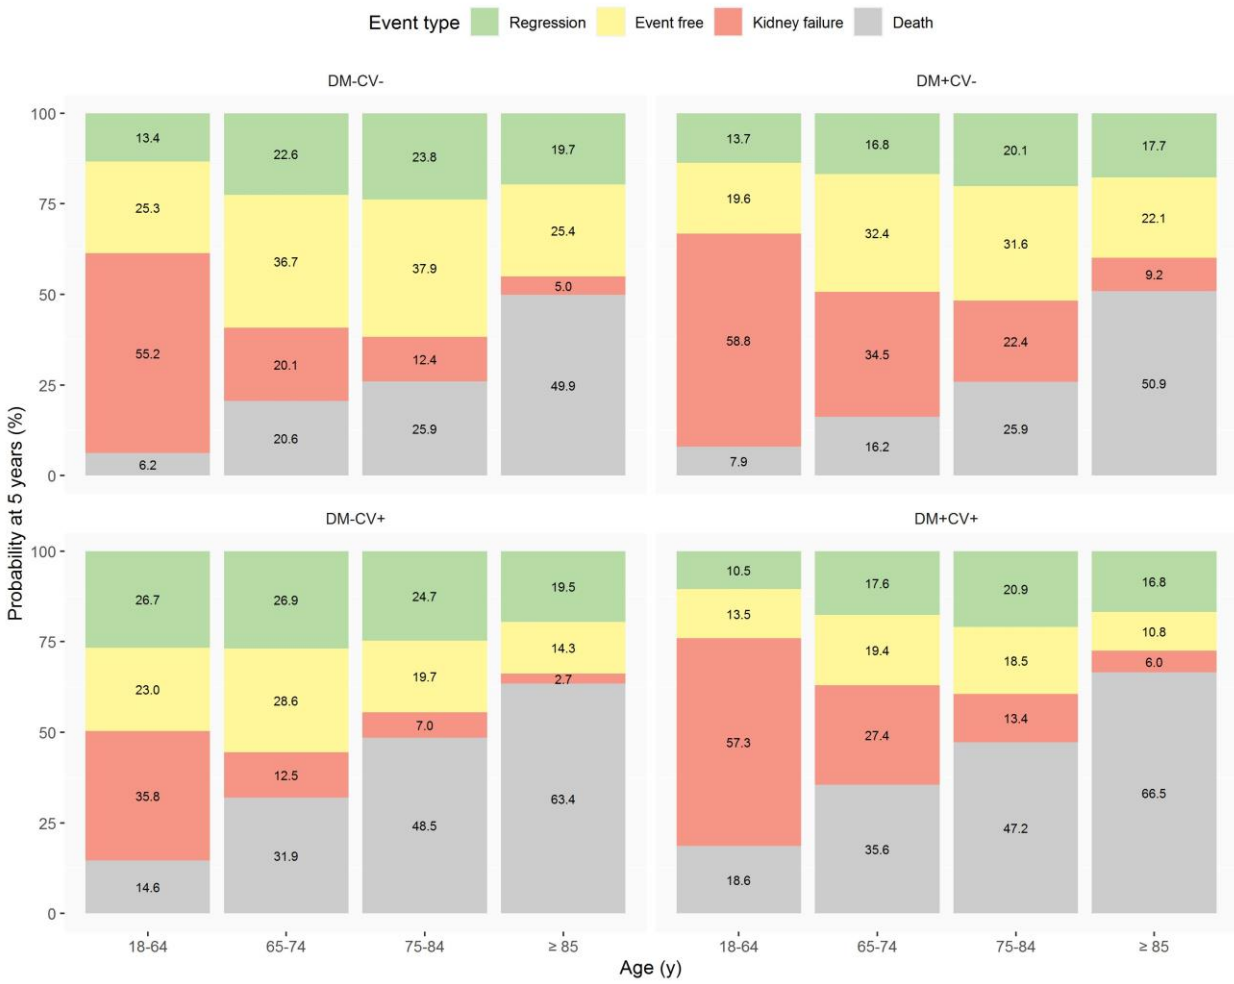

Abbreviations: DM-CV-, without diabetes and cardiovascular disease; DM+CV-, with diabetes and without cardiovascular disease; DM-CV+, without diabetes and with cardiovascular disease; DM+CV+, with diabetes and cardiovascular disease.

**eFigure 13. Cumulative Incidence Functions Over Time Following Regression**

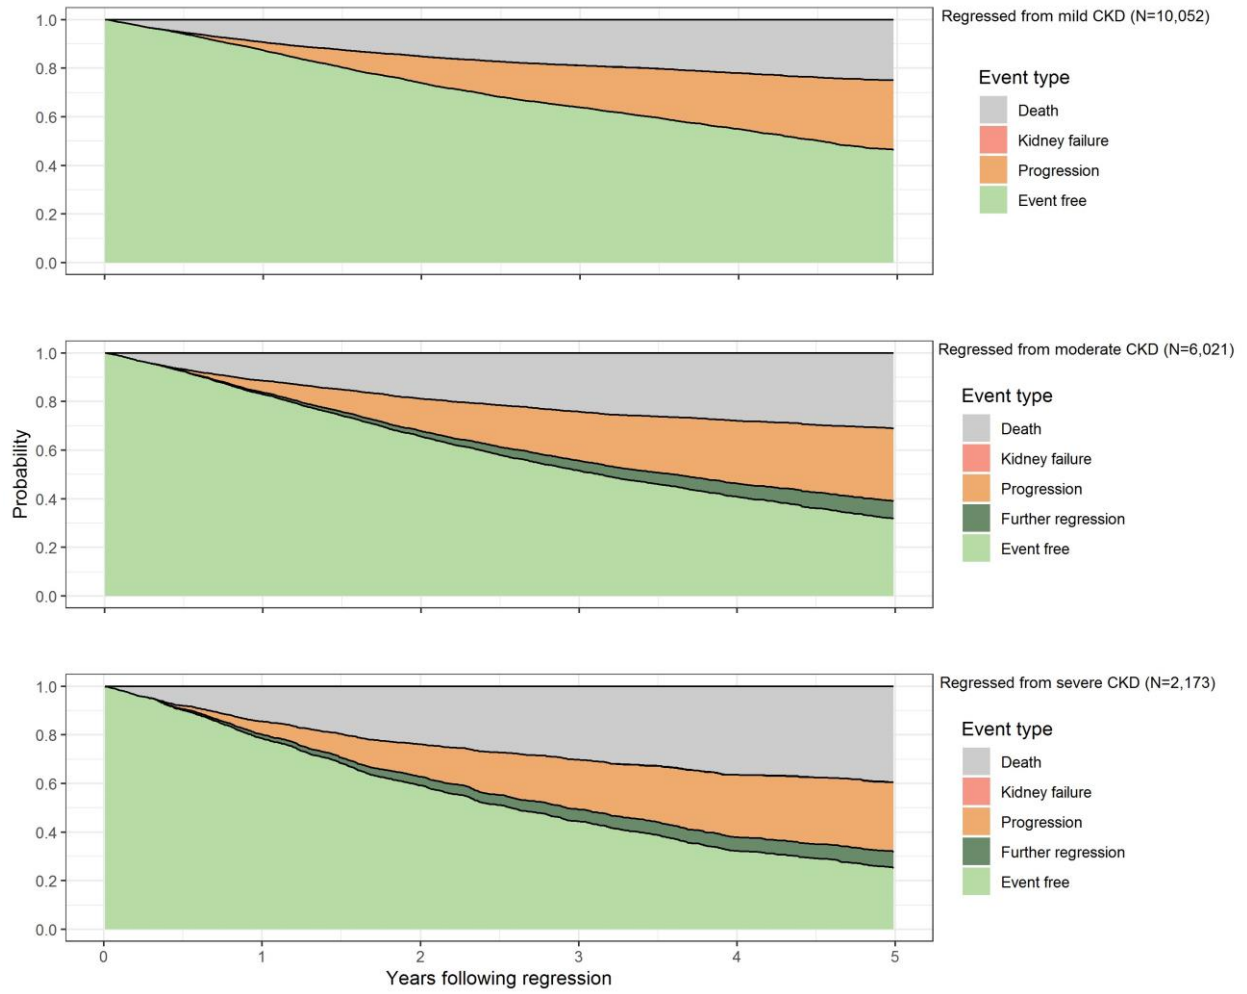



**eFigure 14. Probabilities of Outcomes at 5 Years Following Regression**

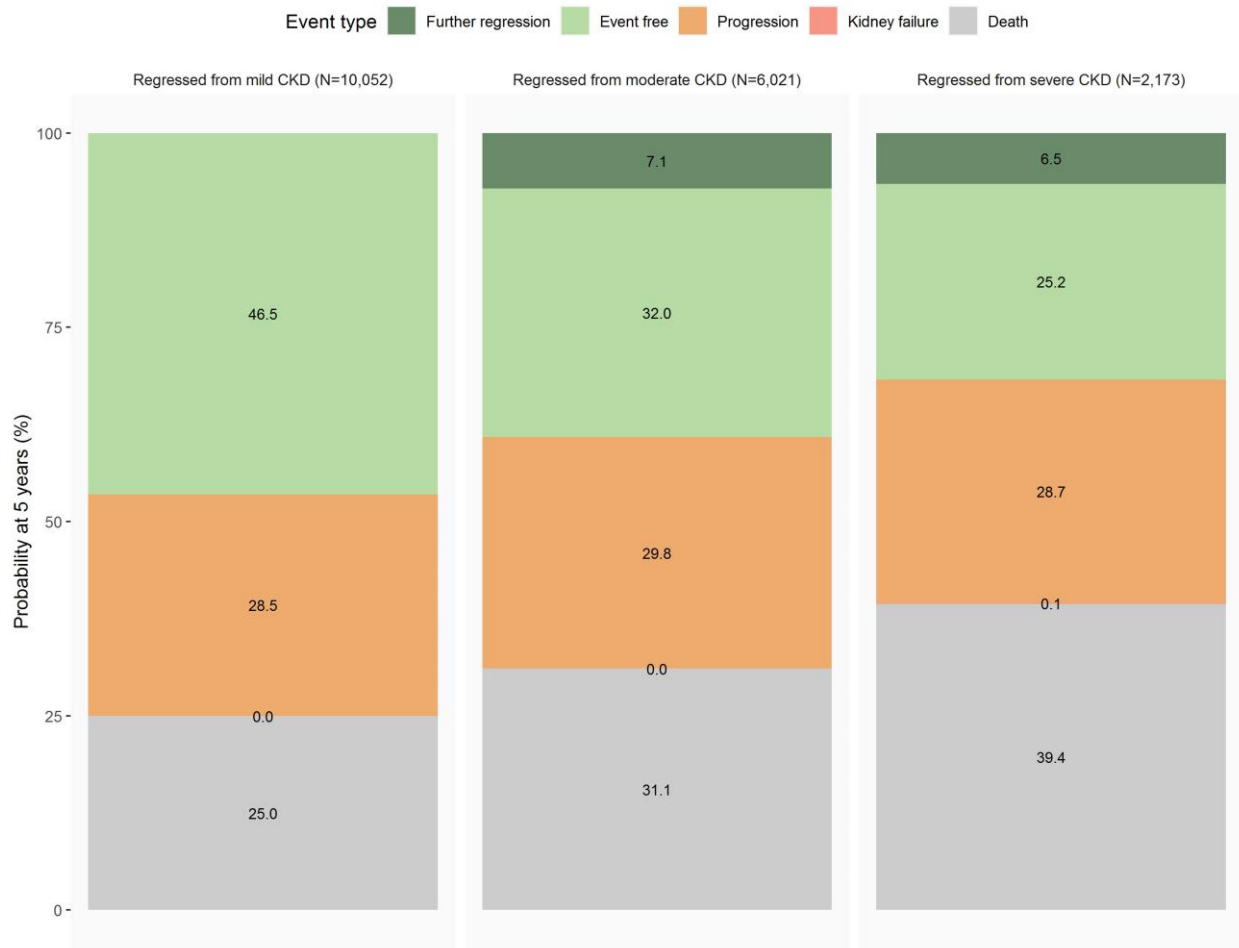

**eFigure 15. Probabilities of Outcomes at 5 Years Following Regression, by Age Categories**

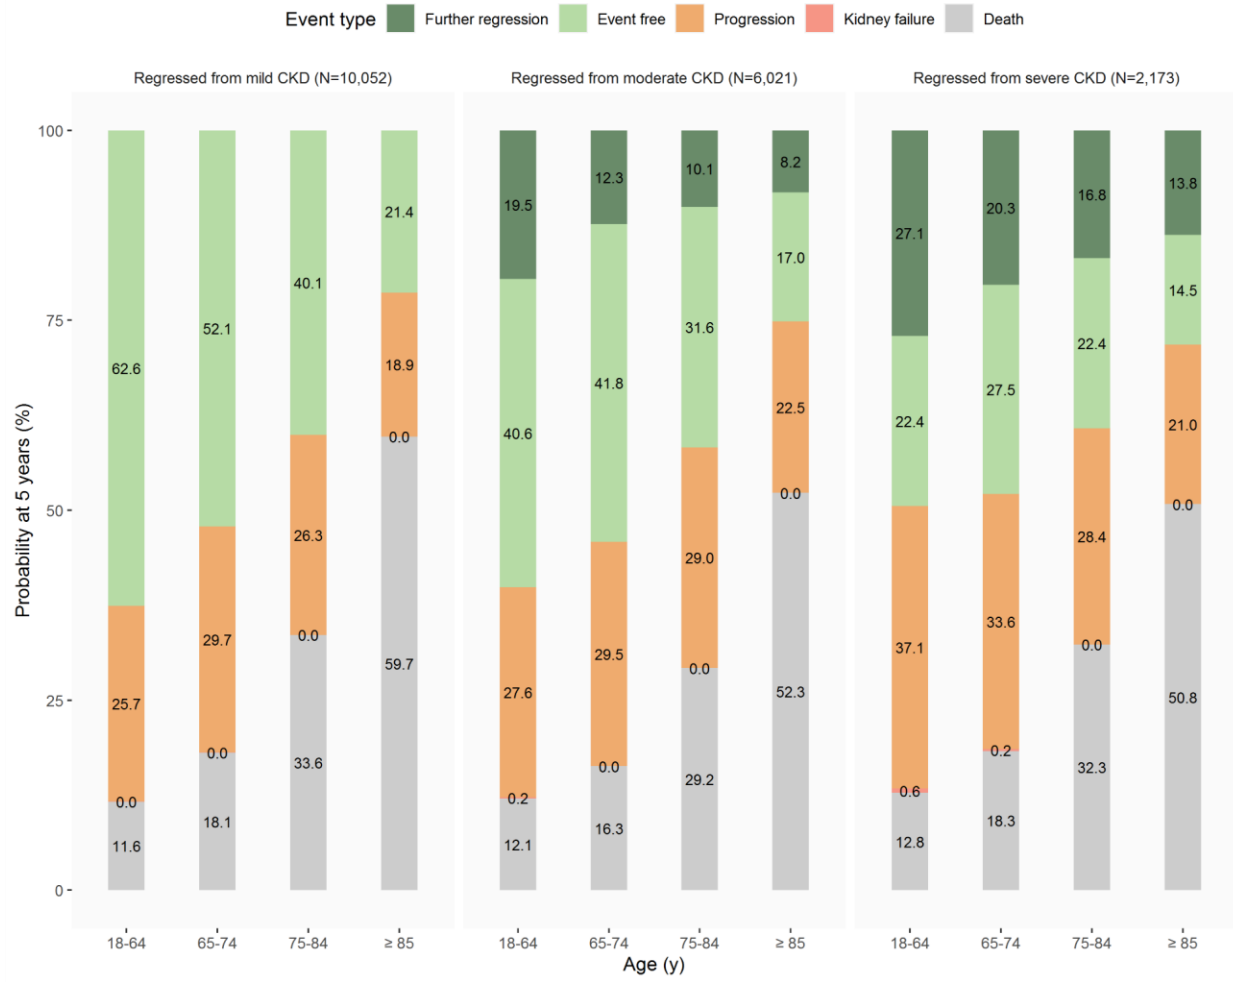

**eFigure 16. Incidence of CKD, by CKD Stage and Age Categories (Moving Average eGFR Method)**

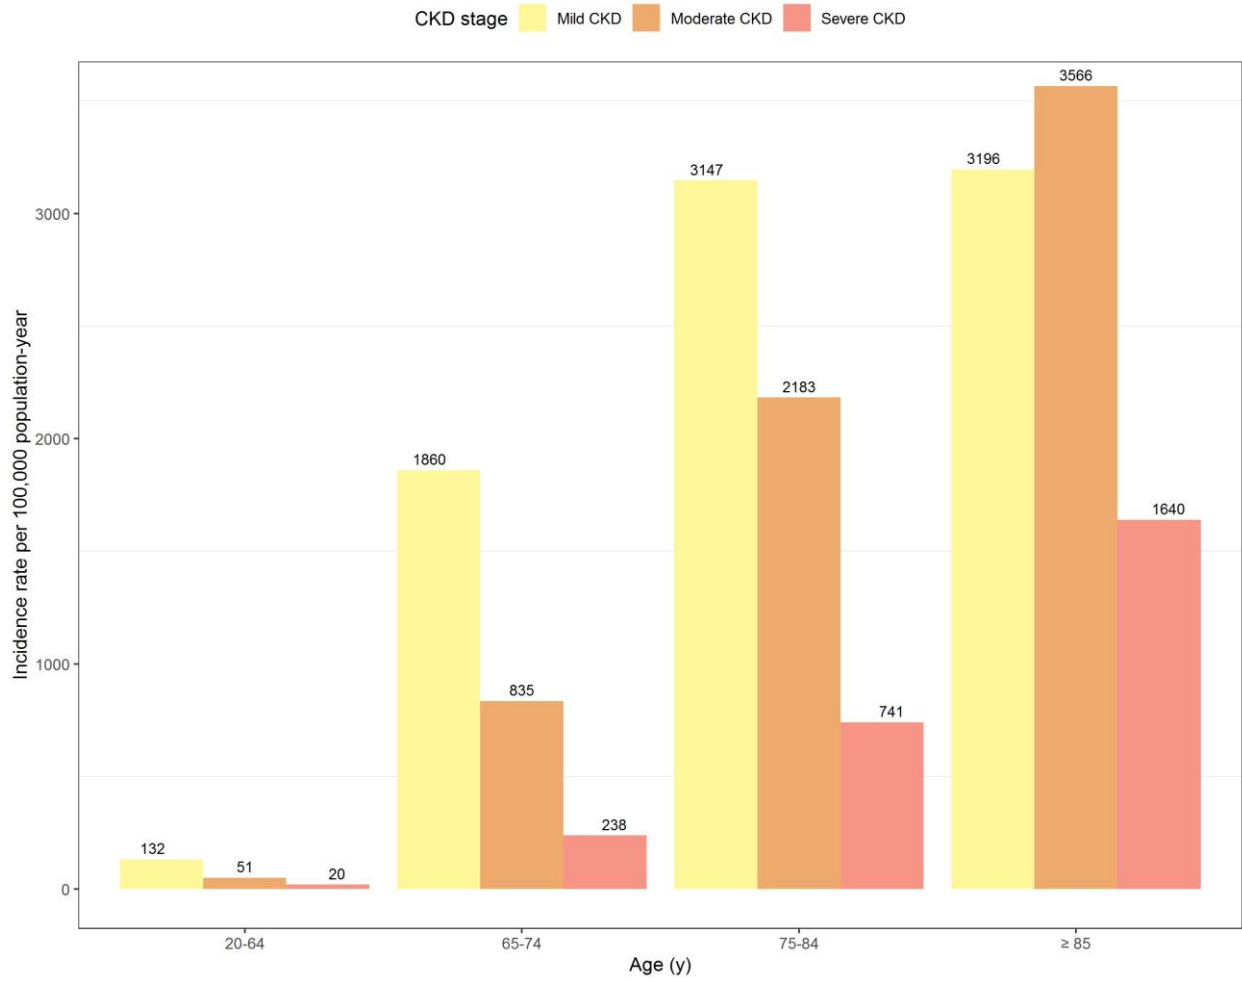

**eFigure 17. Probabilities of Outcomes at 5 Years From Initial CKD Stage (Moving Average eGFR Method)**

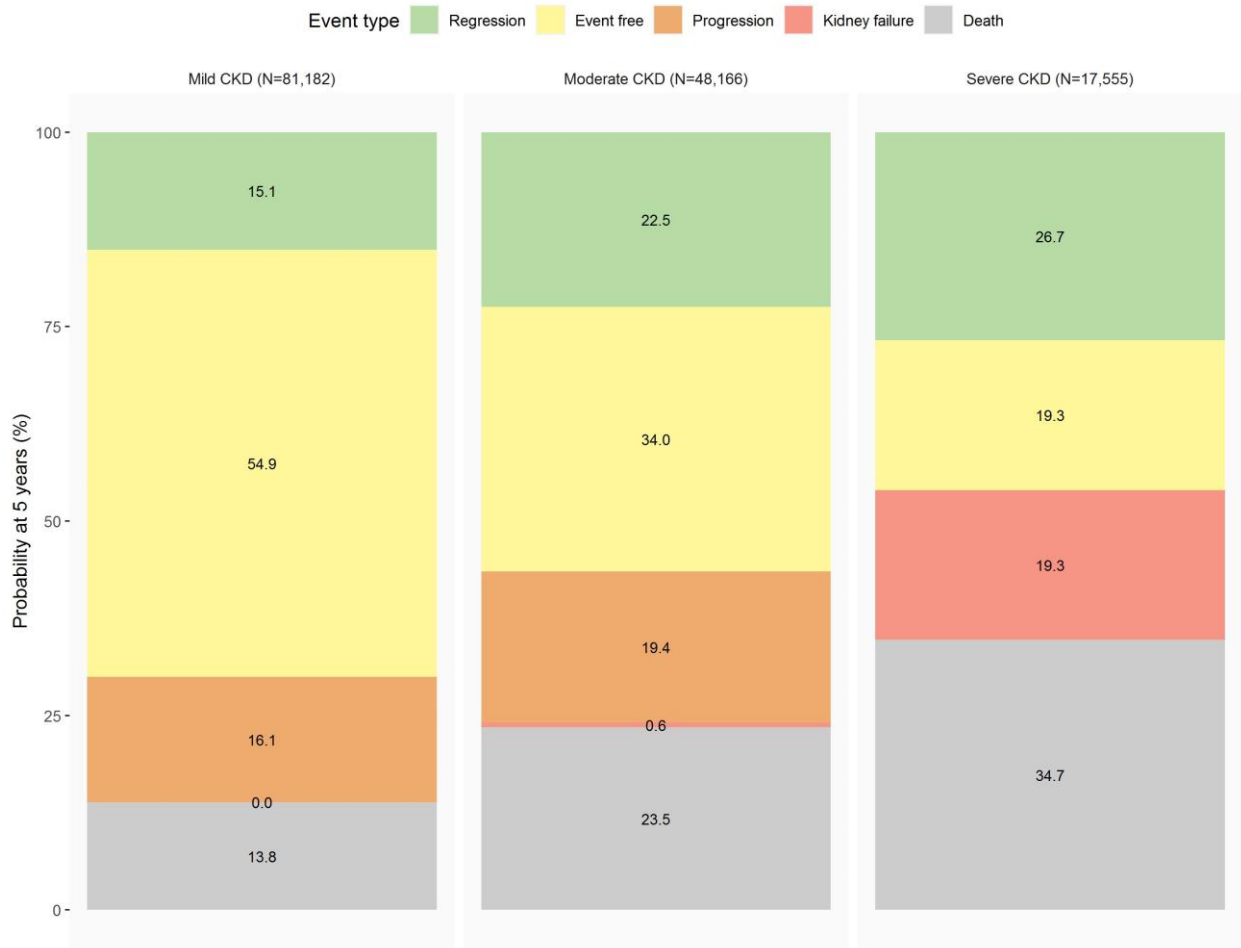

**eFigure 18. Probabilities of Outcomes at 5 Years From Initial CKD Stage, by Age Categories (Moving Average eGFR Method)**

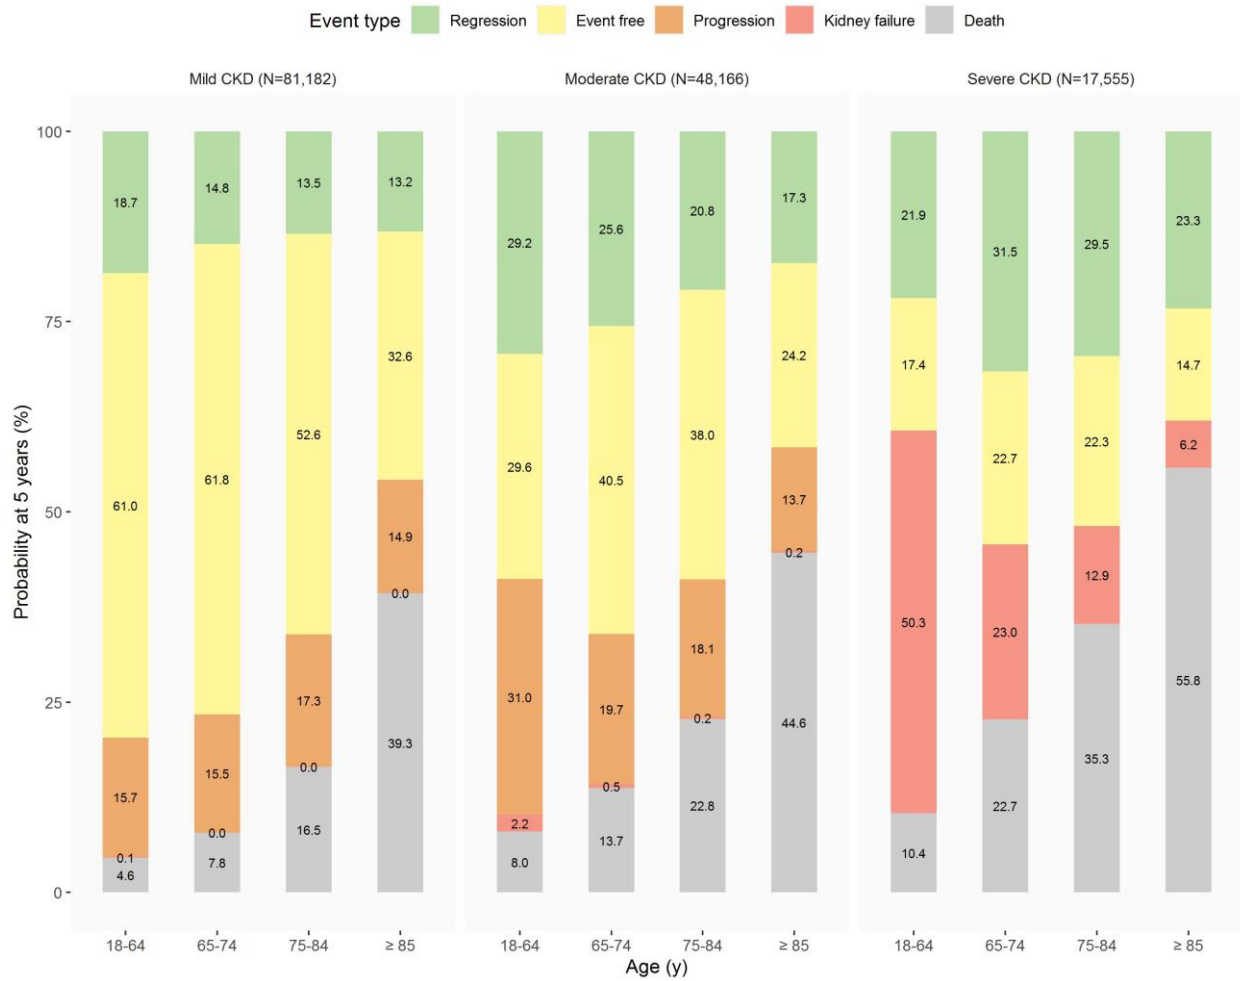

**eFigure 19. Probabilities of Outcomes at 5 Years From Initial CKD Stage (91-455 Days Chronicity Criterion)**

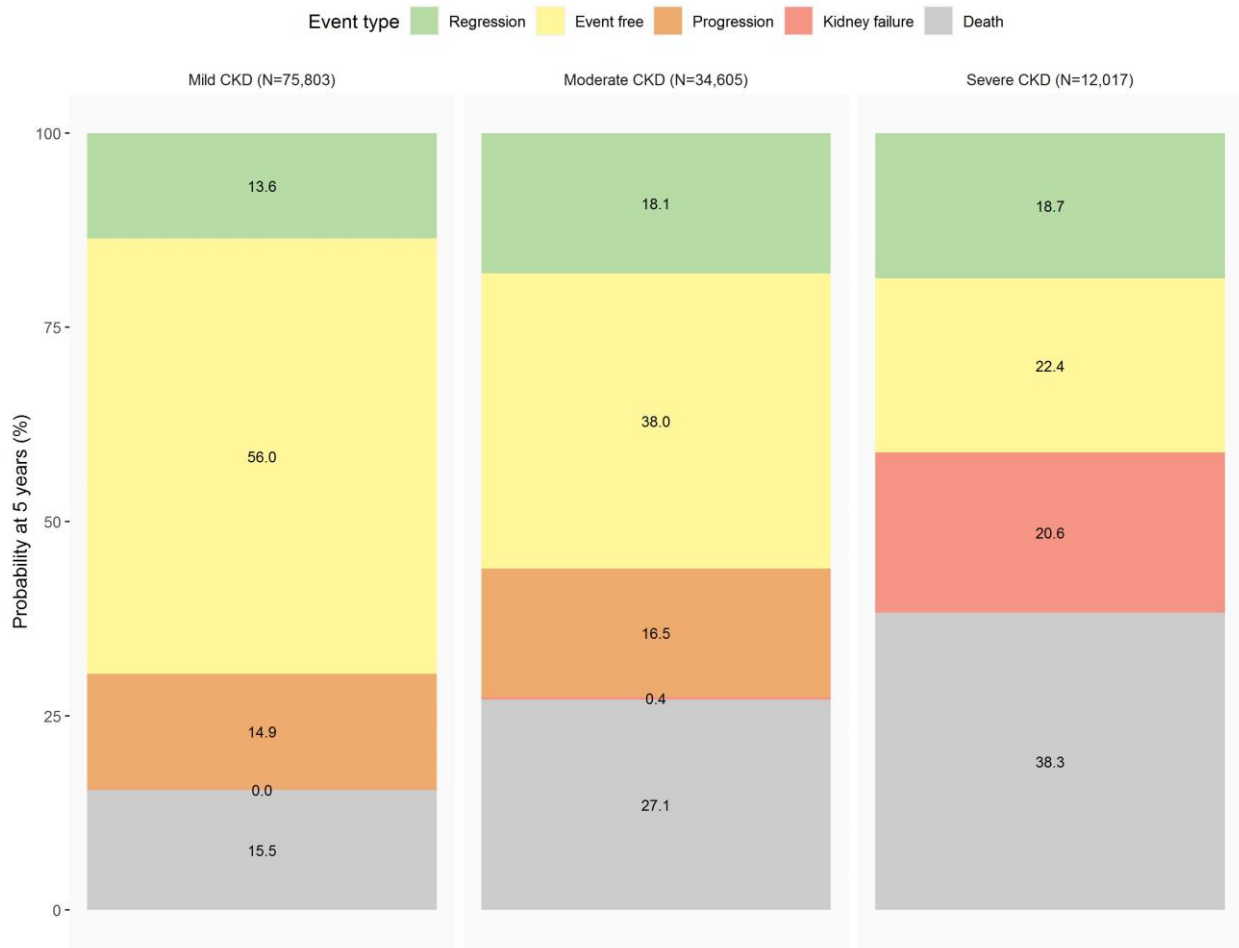

**eFigure 20. Probabilities of Outcomes at 5 Years From Initial CKD Stage, by Age Categories (91-455 Days Chronicity Criterion)**

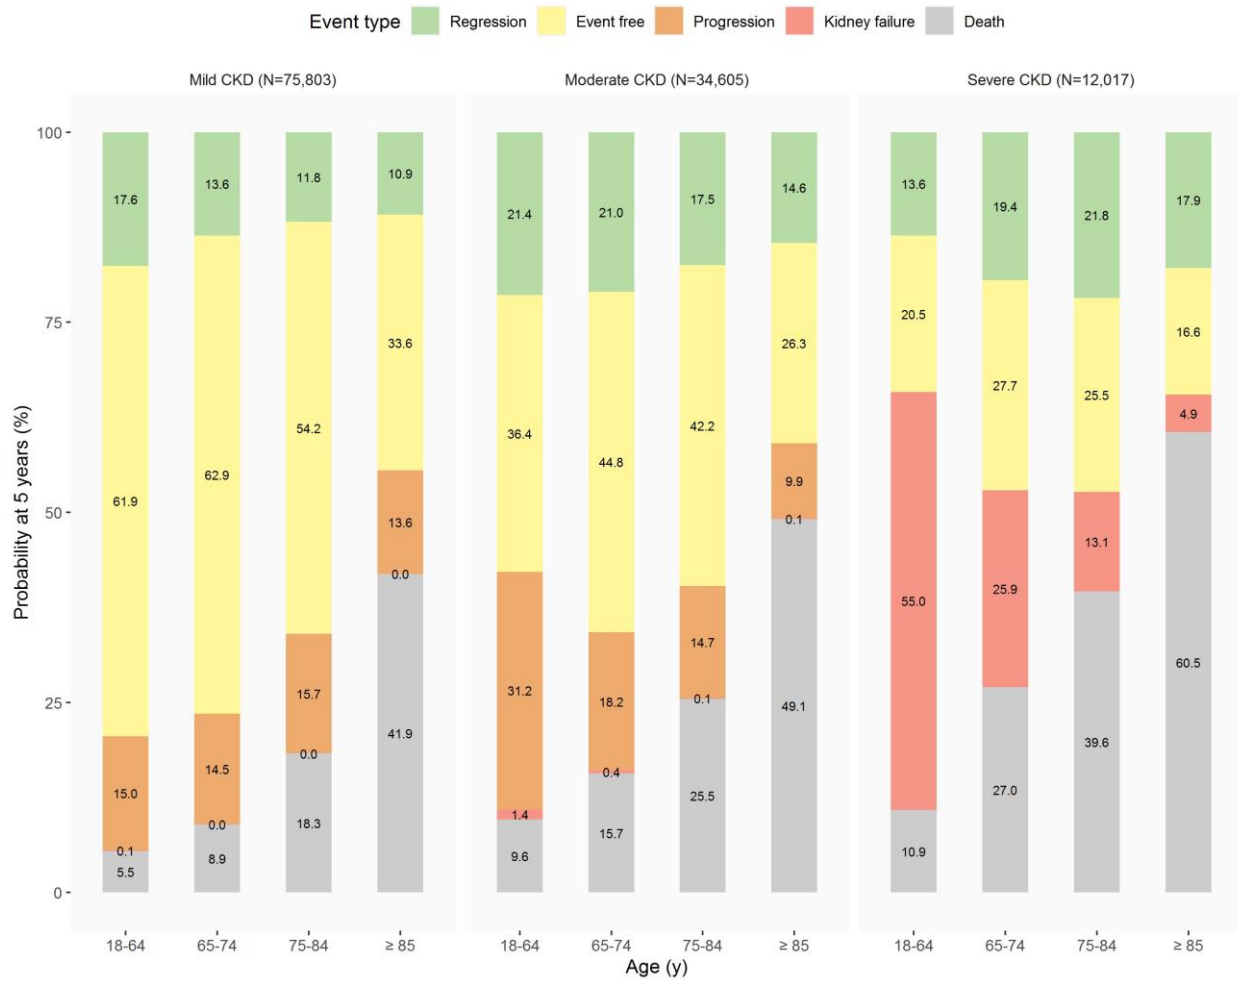

## eReferences

1. Kidney Disease: Improving Global Outcomes (KDIGO) CKD Work Group. KDIGO 2012 Clinical Practice Guideline for the Evaluation and Management of Chronic Kidney Disease. *Kidney Int Suppl.* 2013;3(1):112-119.
2. Tonelli M, Vachharajani TJ, Wiebe N, et al. Methods for identifying 30 chronic conditions: application to administrative data. *BMC Med Inform Decis Mak.* 2015;15:31.
